# Supplementary material for: Copper acetate monohydrate: a cheap but efficient oxidant for synthesizing multi-substituted indolizines from pyridinium ylides and electron deficient alkenes
Source: Royal Society of Chemistry journal article supplement (doi:10.1039/c2ra21213g), 2012-01-01

## Electronic Supporting Information

### **Copper acetate monohydrate: a cheap but efficient oxidant for synthesis multi-substituted indolizines from pyridinium ylides and electron deficient alkenes**

Huayou Hu,<sup>\*a,b</sup> Junjun Feng<sup>a</sup>, Yulan Zhu<sup>a</sup>, Ning Gu<sup>b</sup> and Yuhe Kan<sup>\*a</sup>

<sup>a</sup> Address, Department: Jiangsu Key Laboratory for Chemistry of Low-Dimensional materials, School of Chemistry and Chemical Engineering, Huaiyin Normal University, Huaian 223300, P. R. China. Fax: (+)86(517)83525100-1; Tel: (+)86(517)83525100-4; E-mail: njuhhy@hotmail.com; kyh@hytc.edu.cn

<sup>b</sup> Address, State Key Laboratory of Bioelectronics, School of Biological Science and Medical Engineering, Southeast University, Nanjing 210096, P. R. China; E-mail: guning@seu.edu.cn

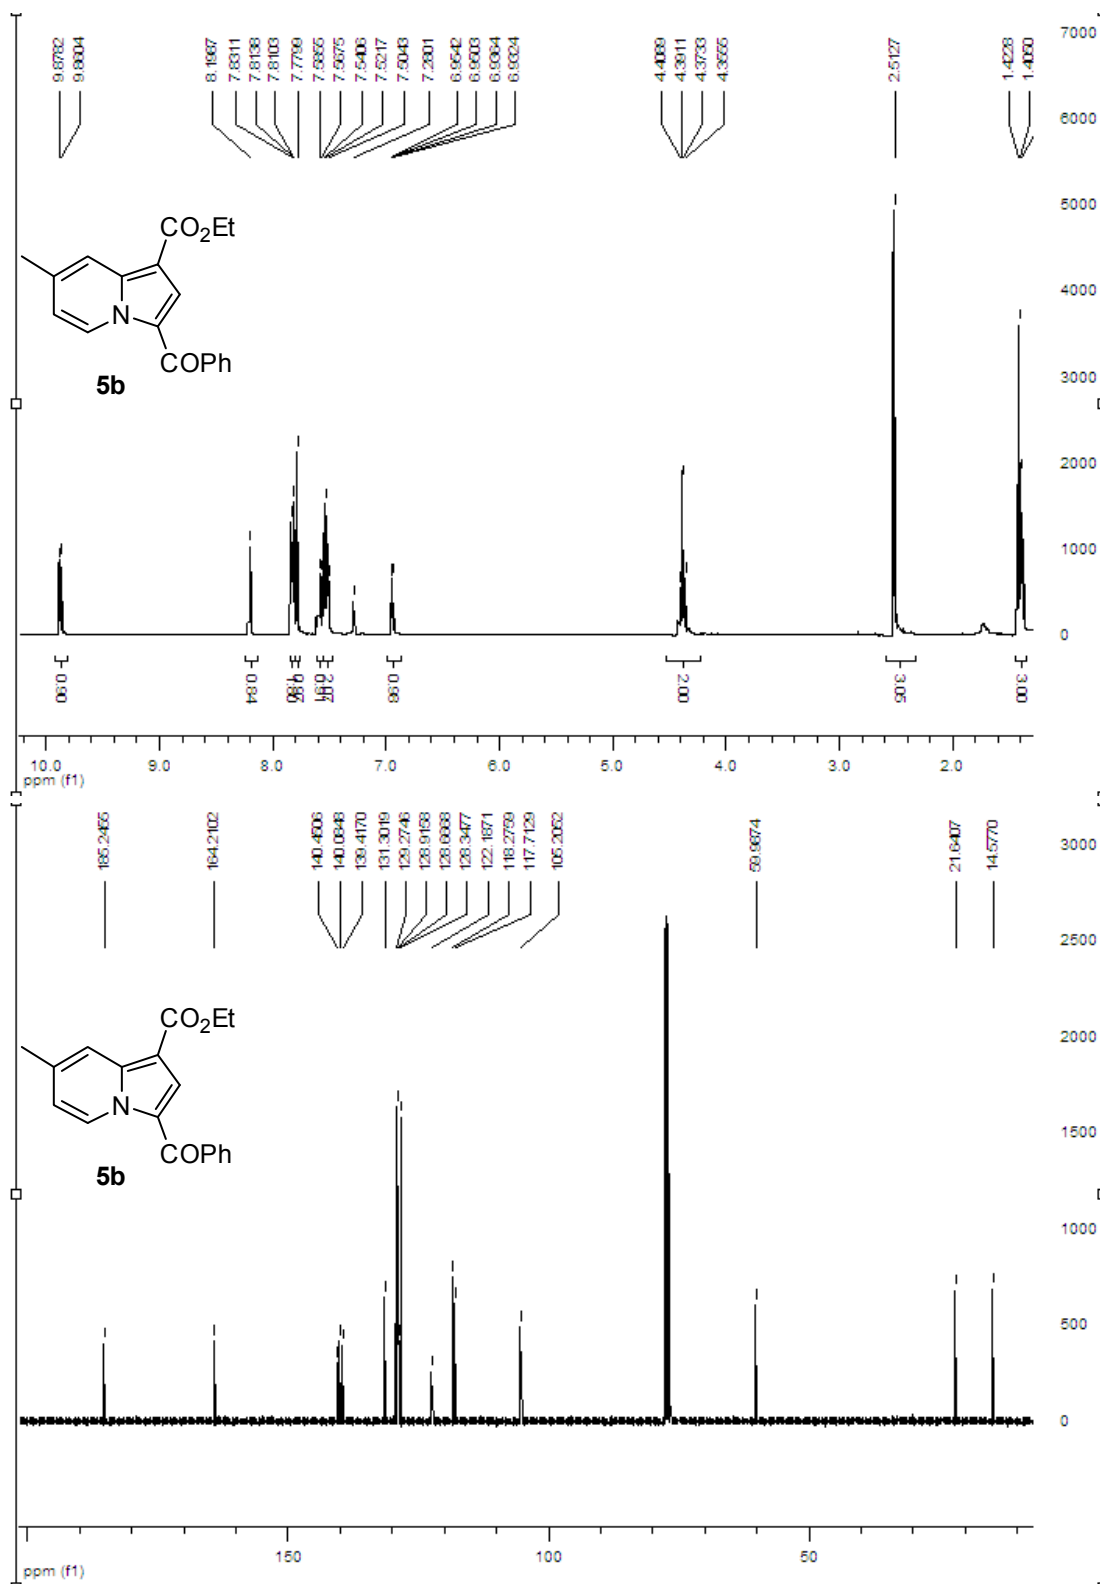

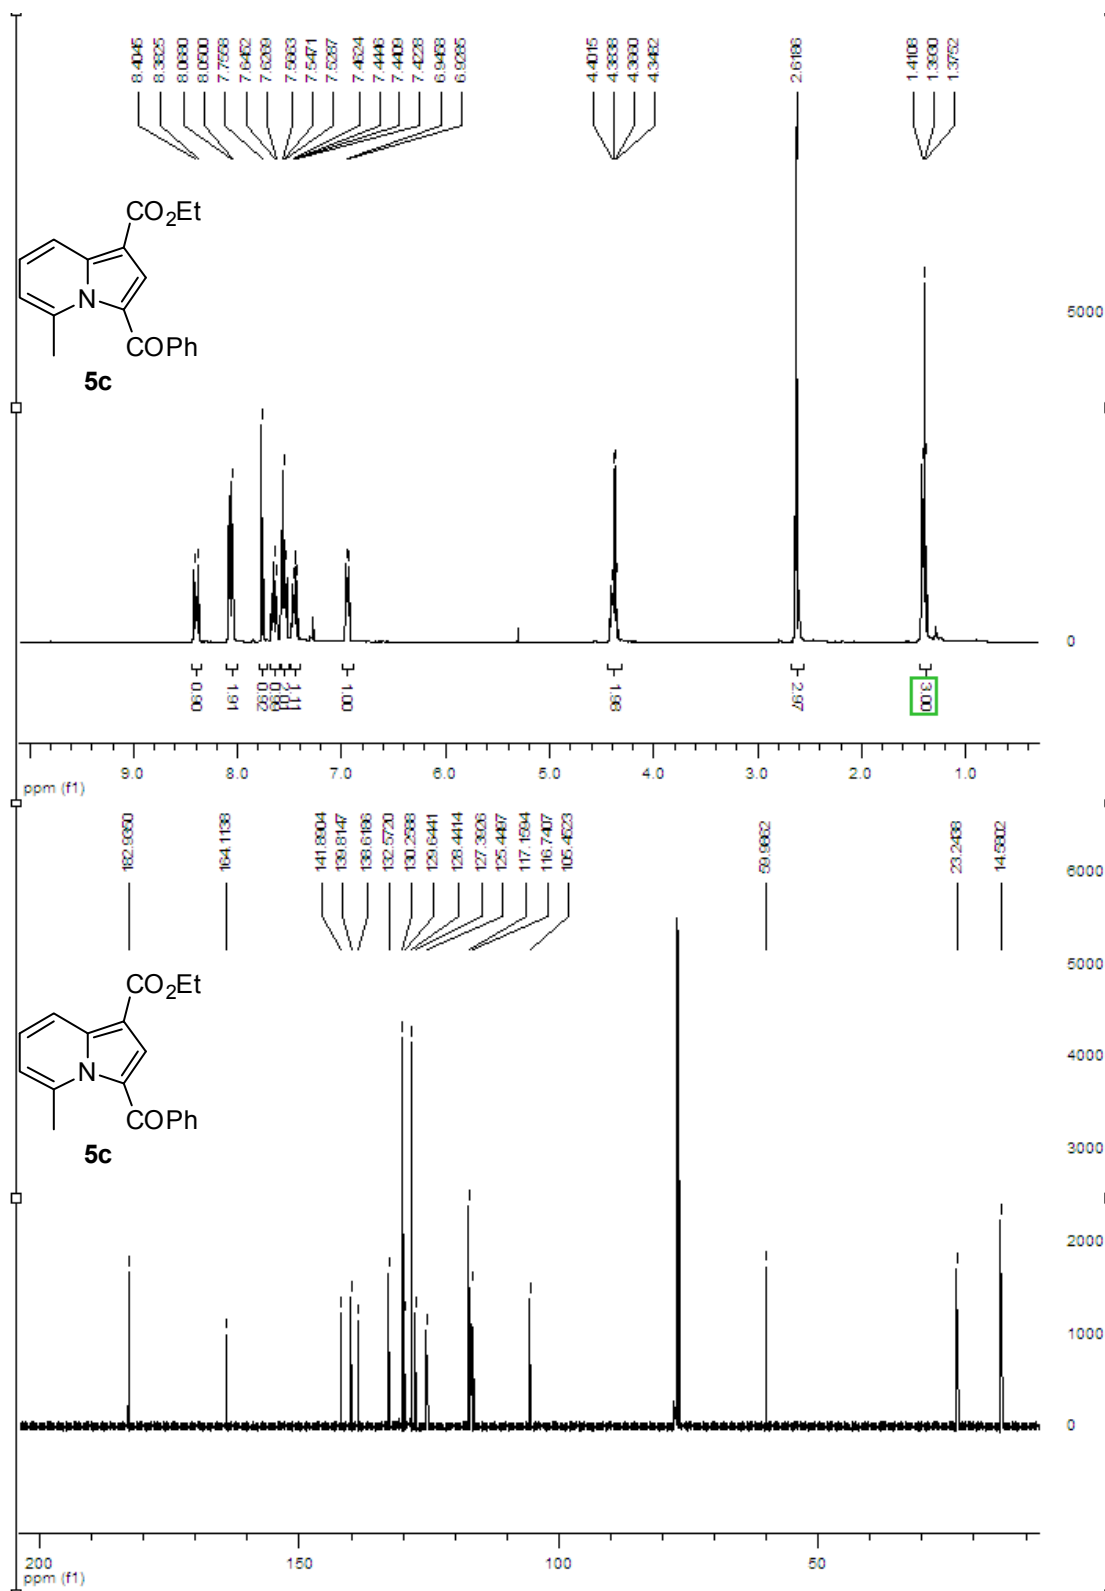

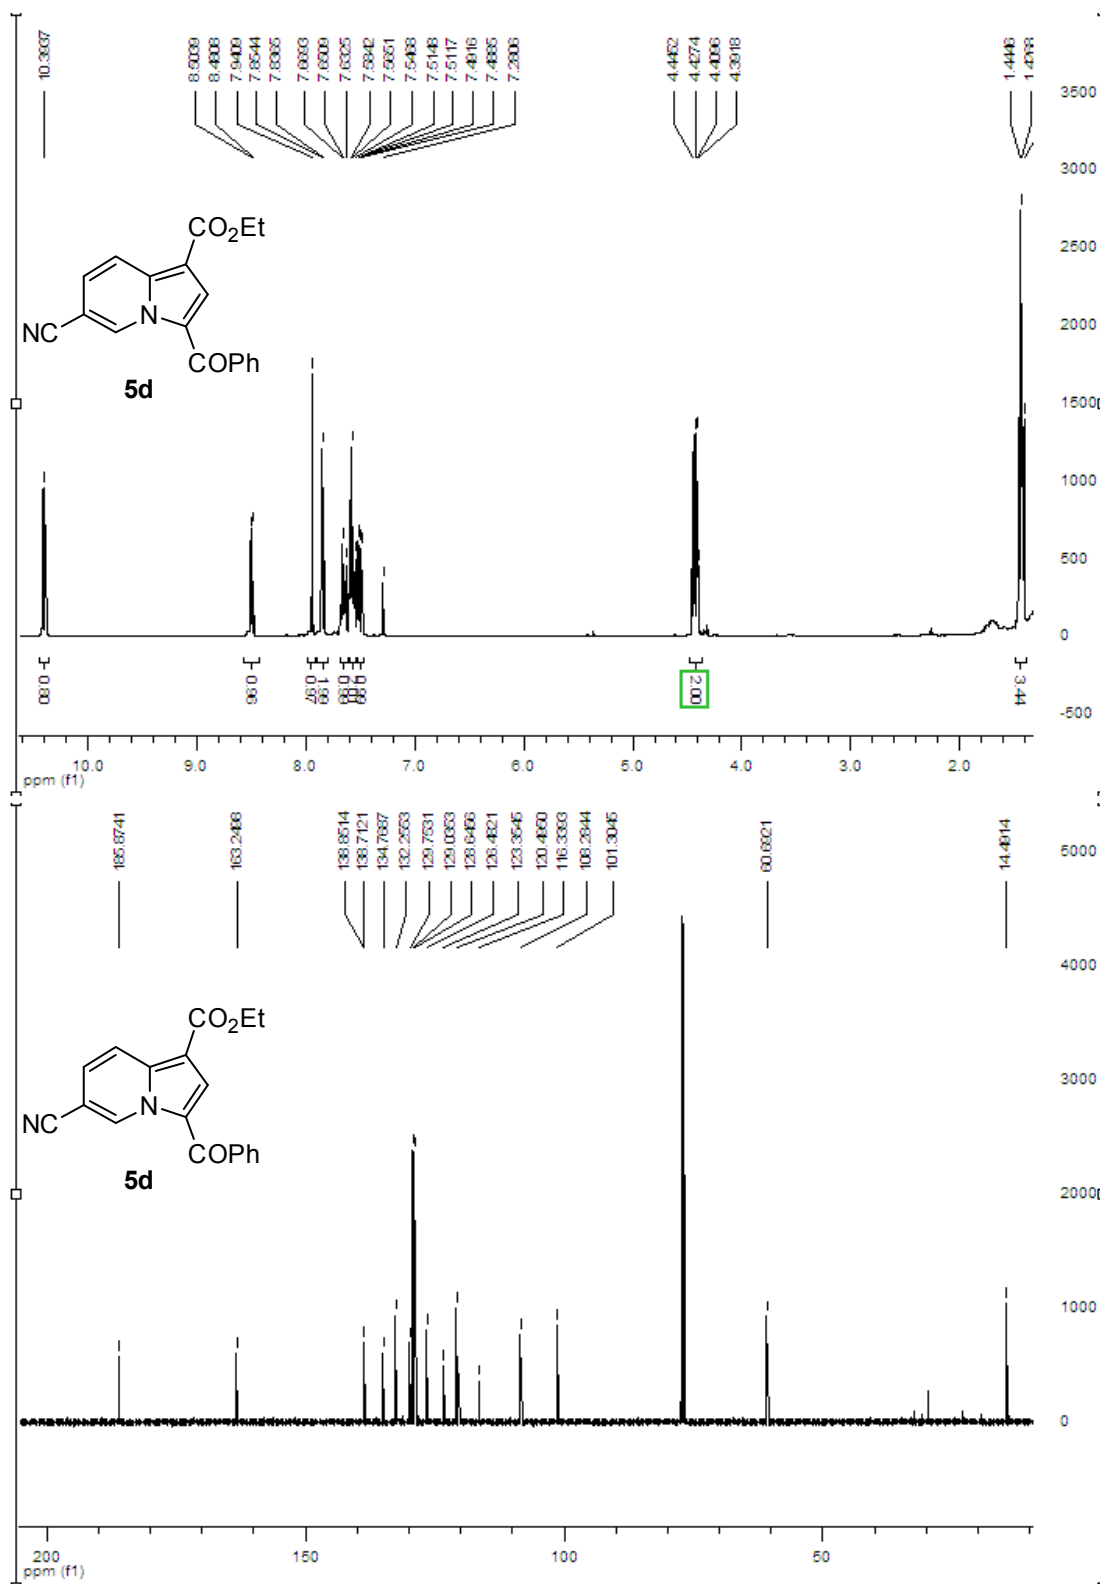

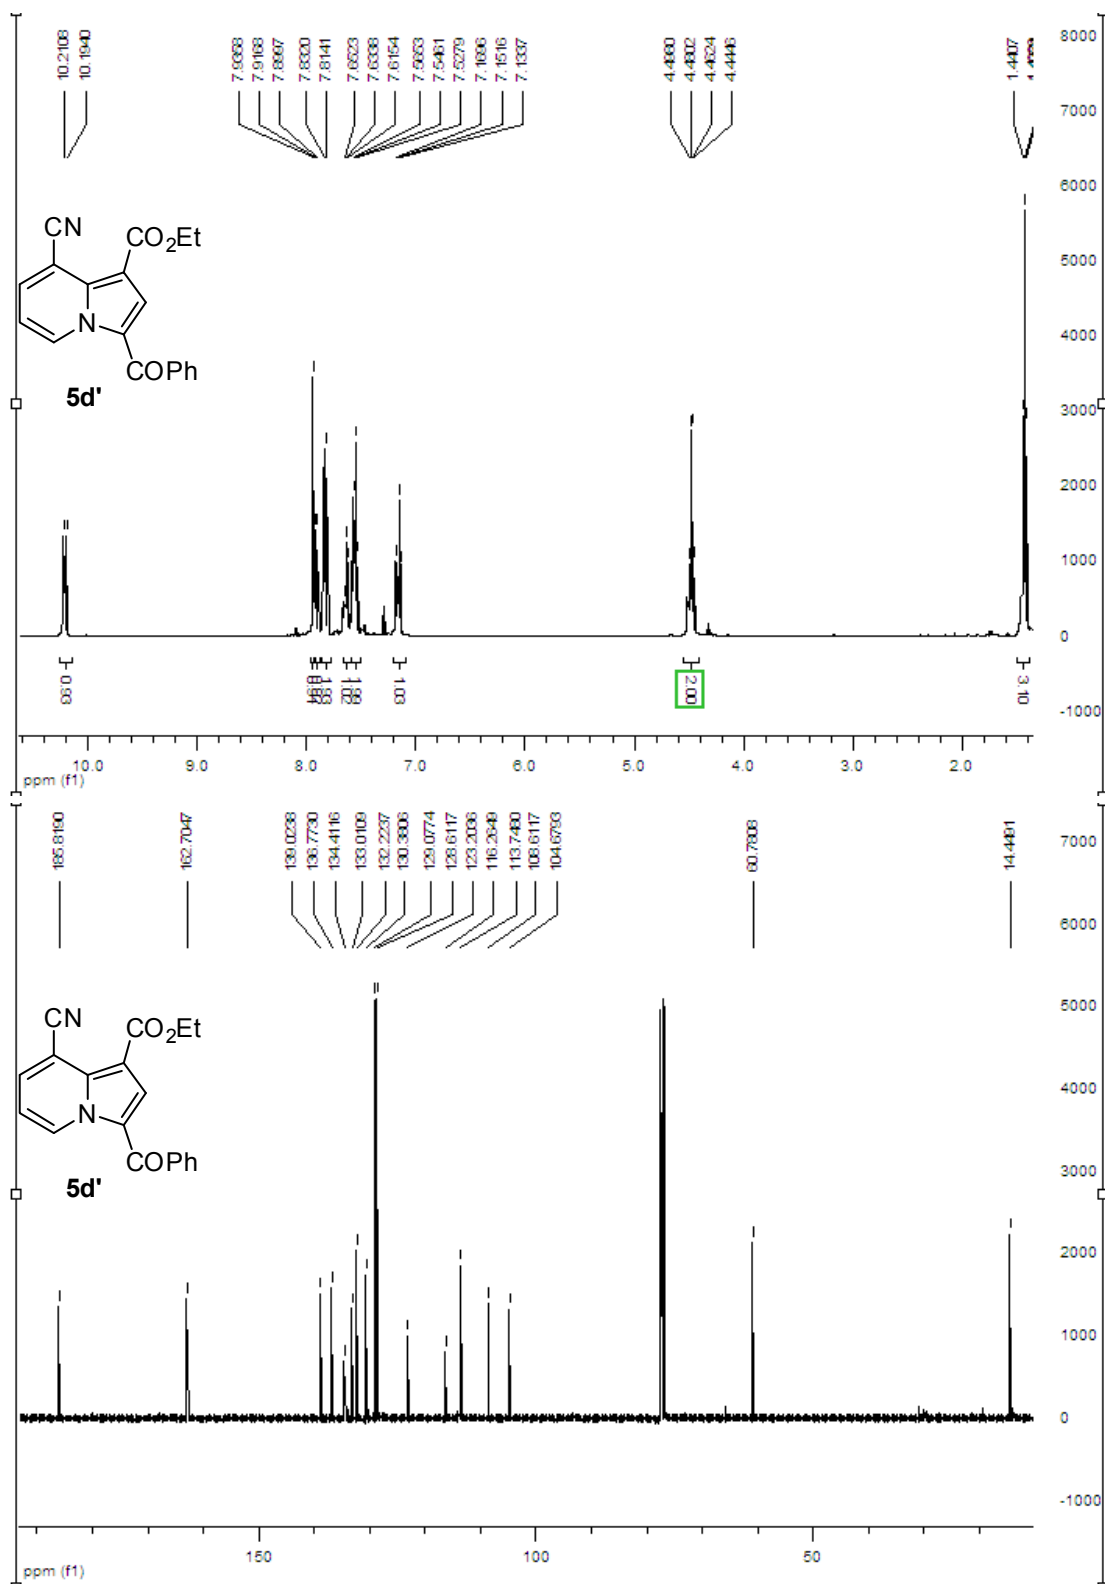

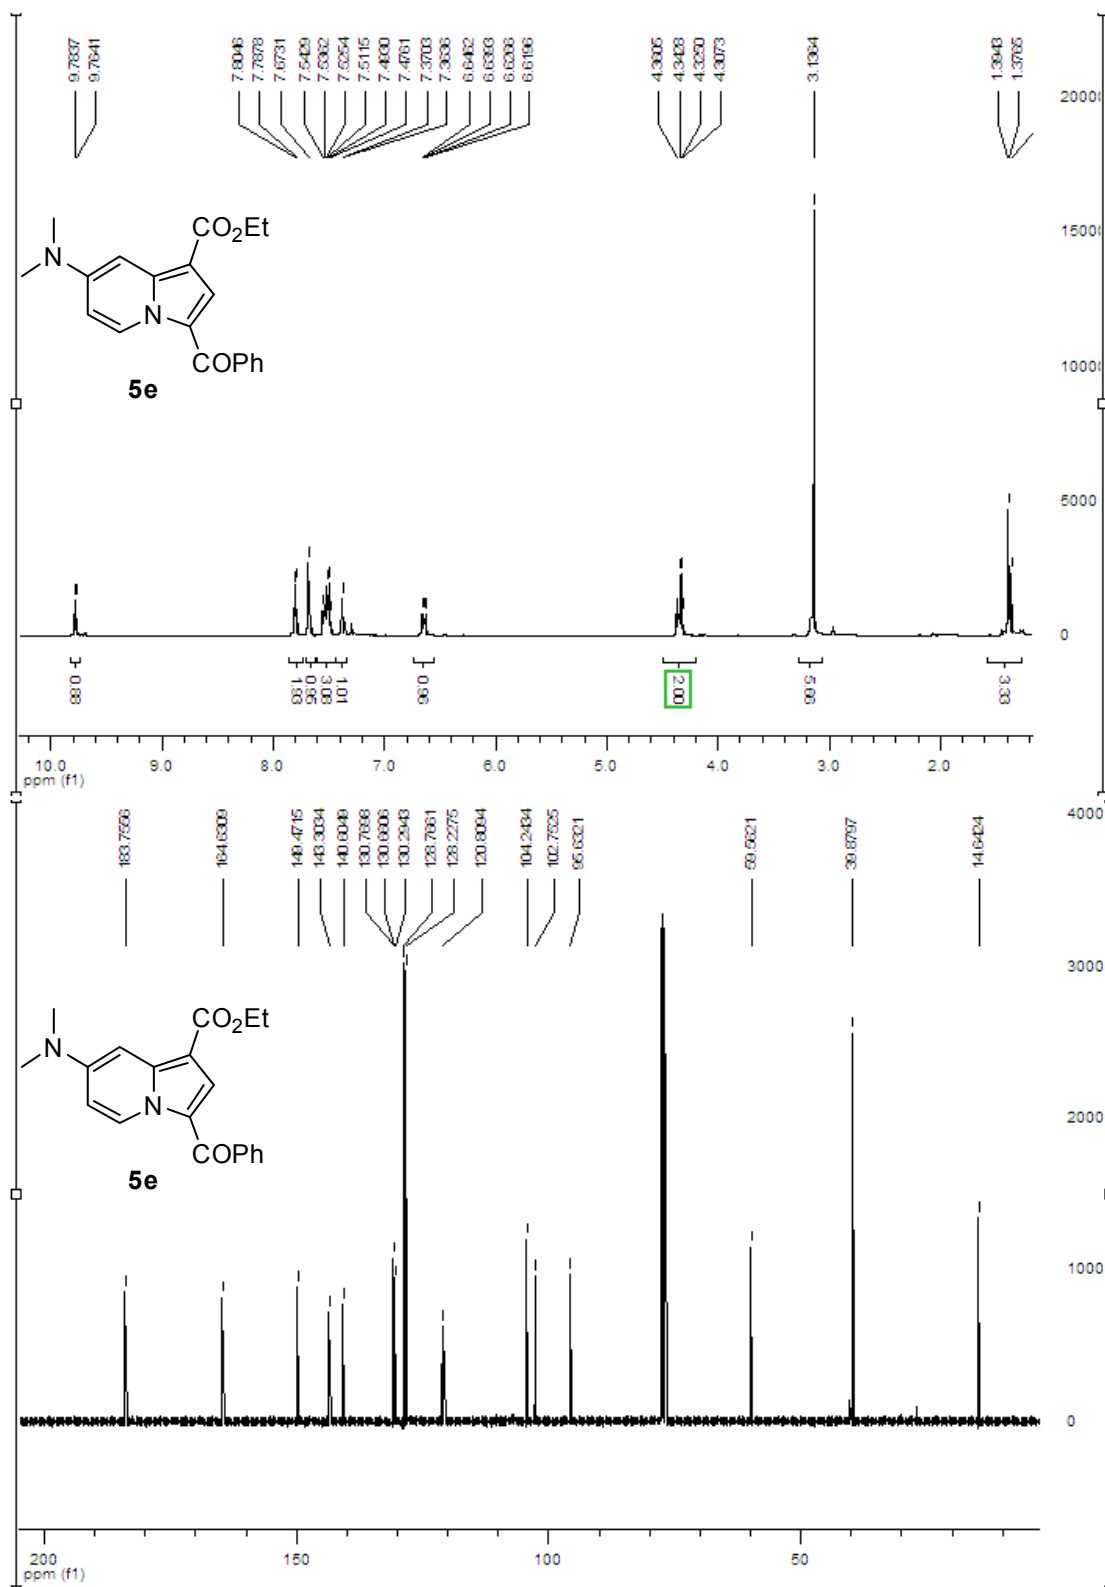

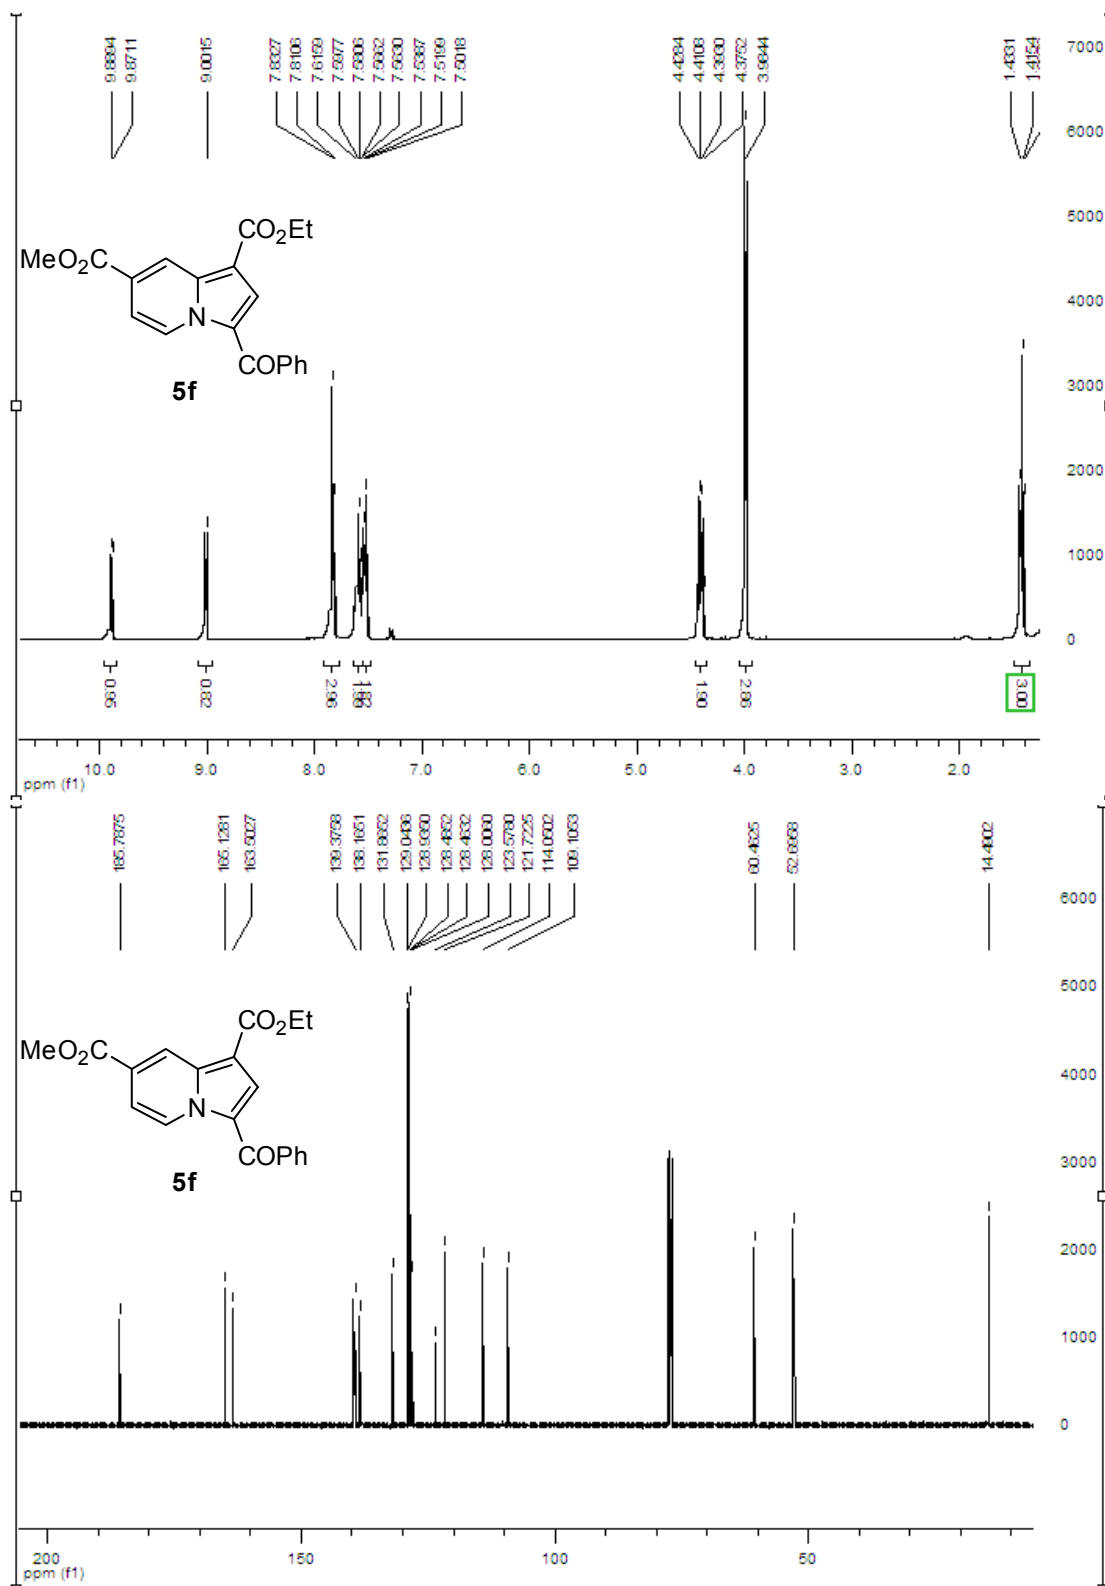

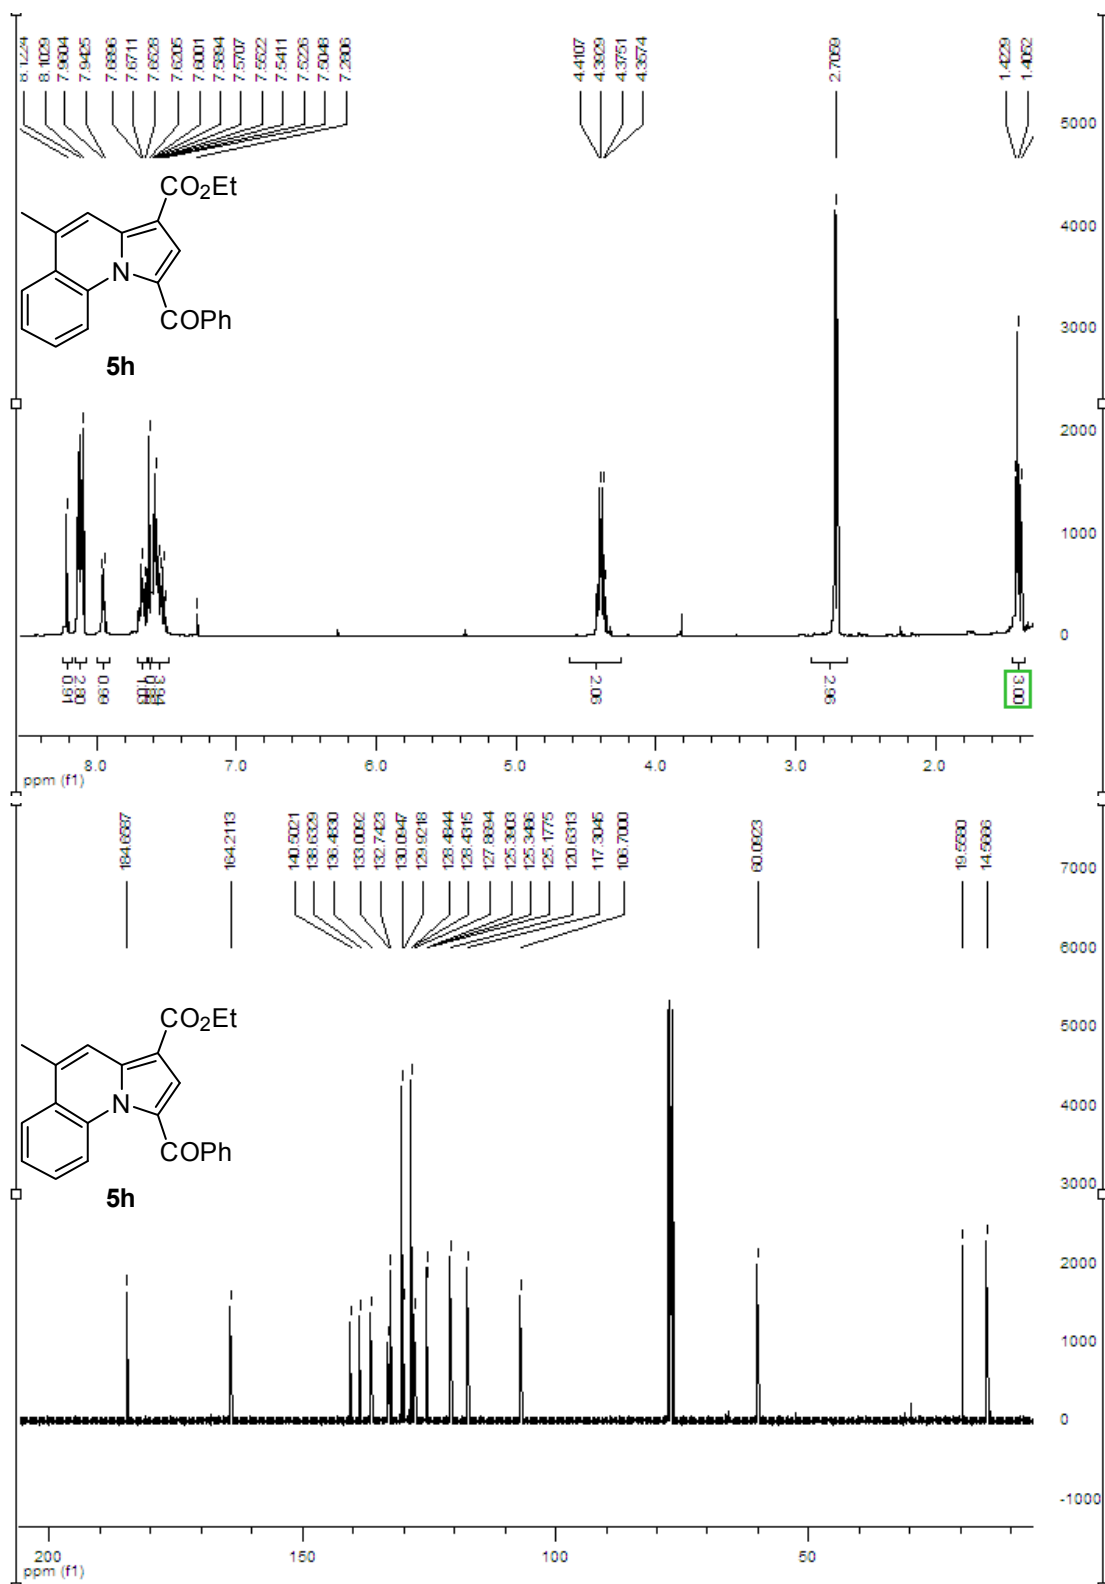



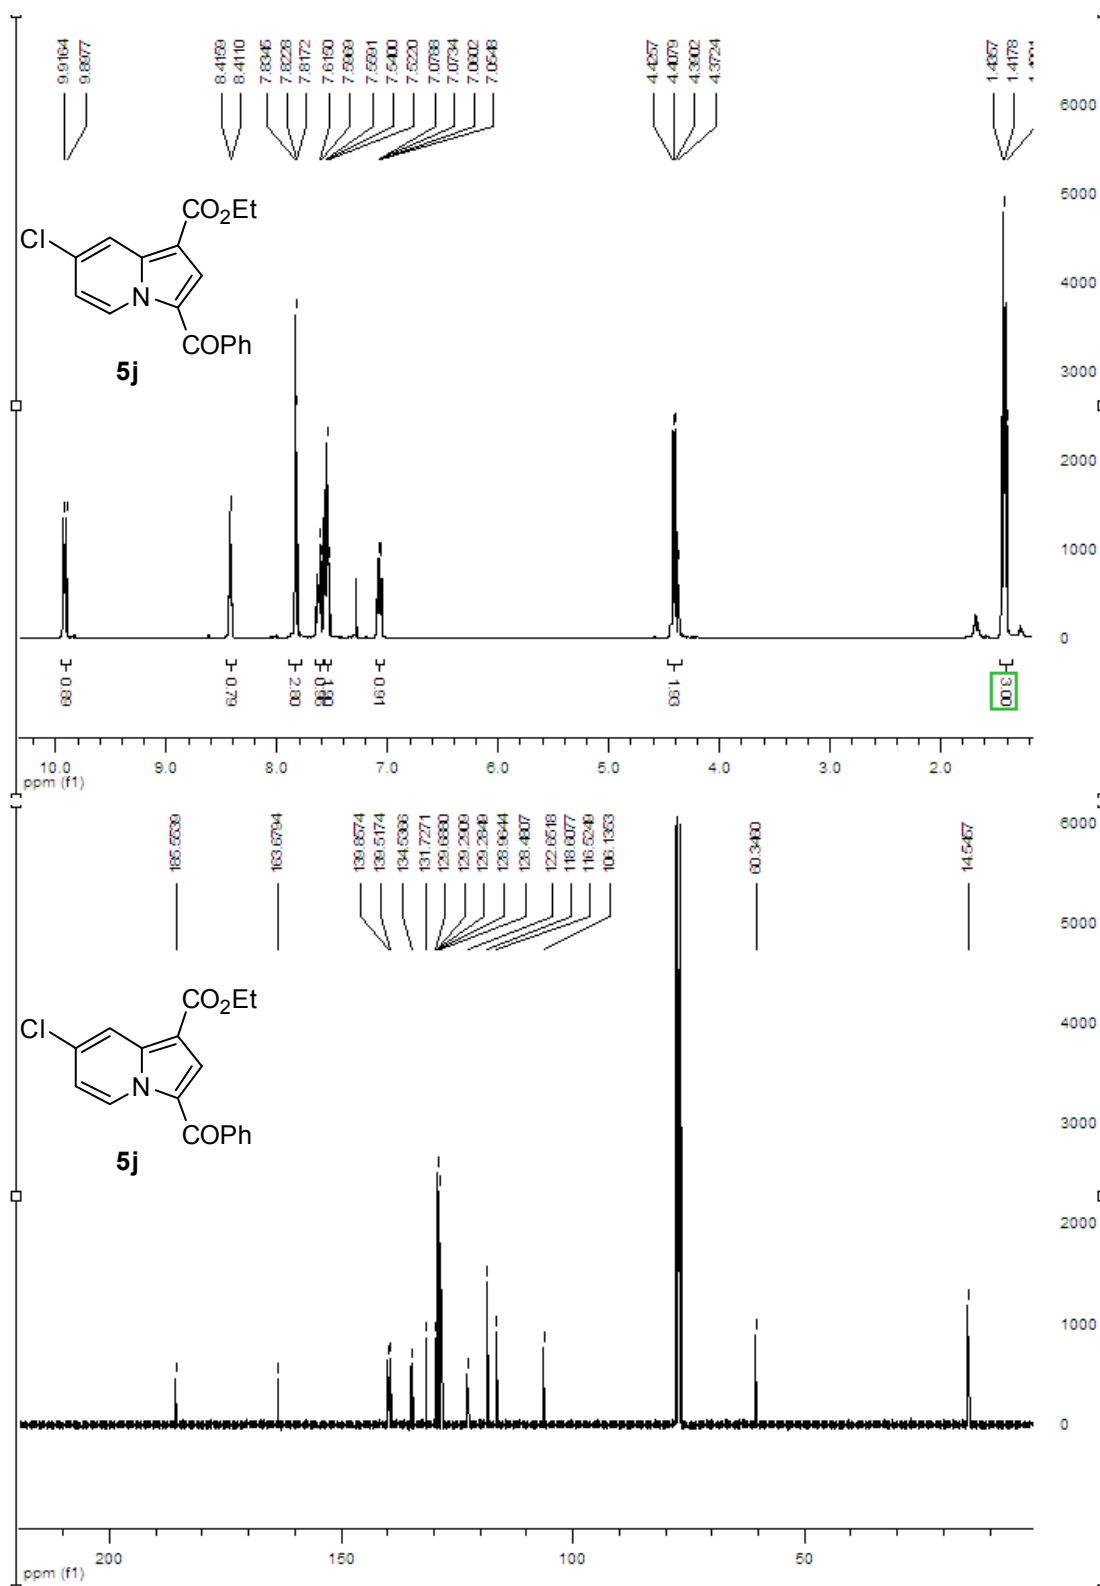

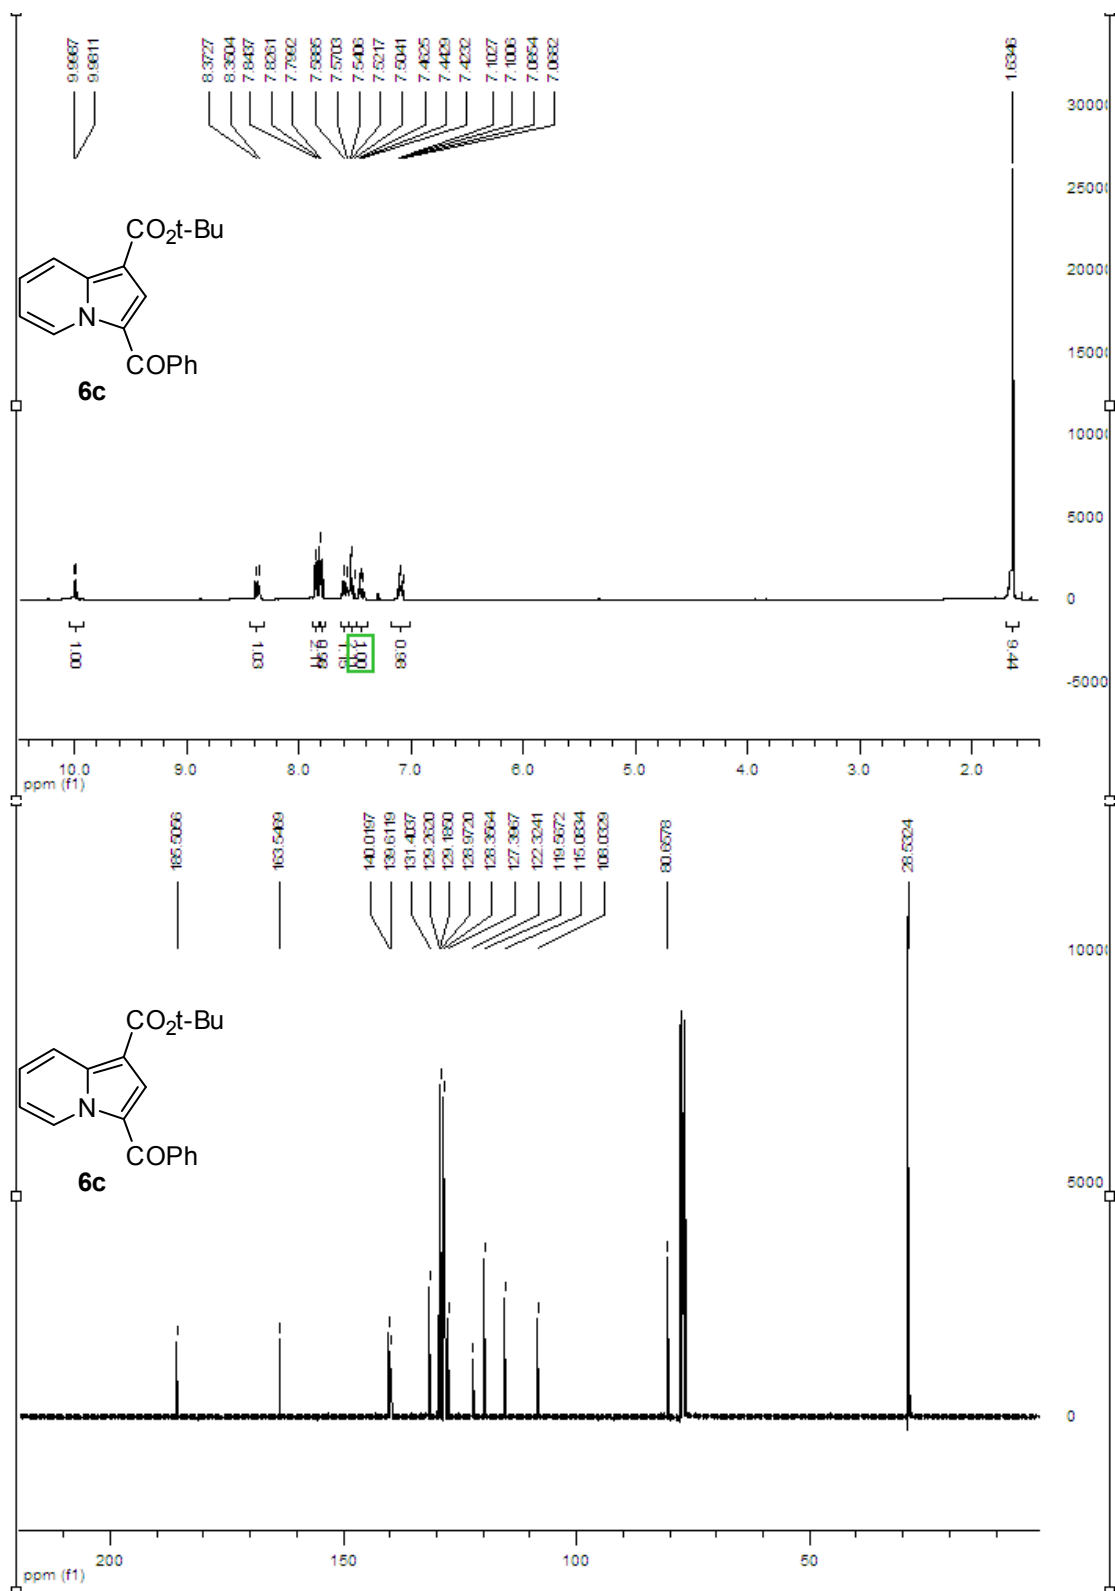

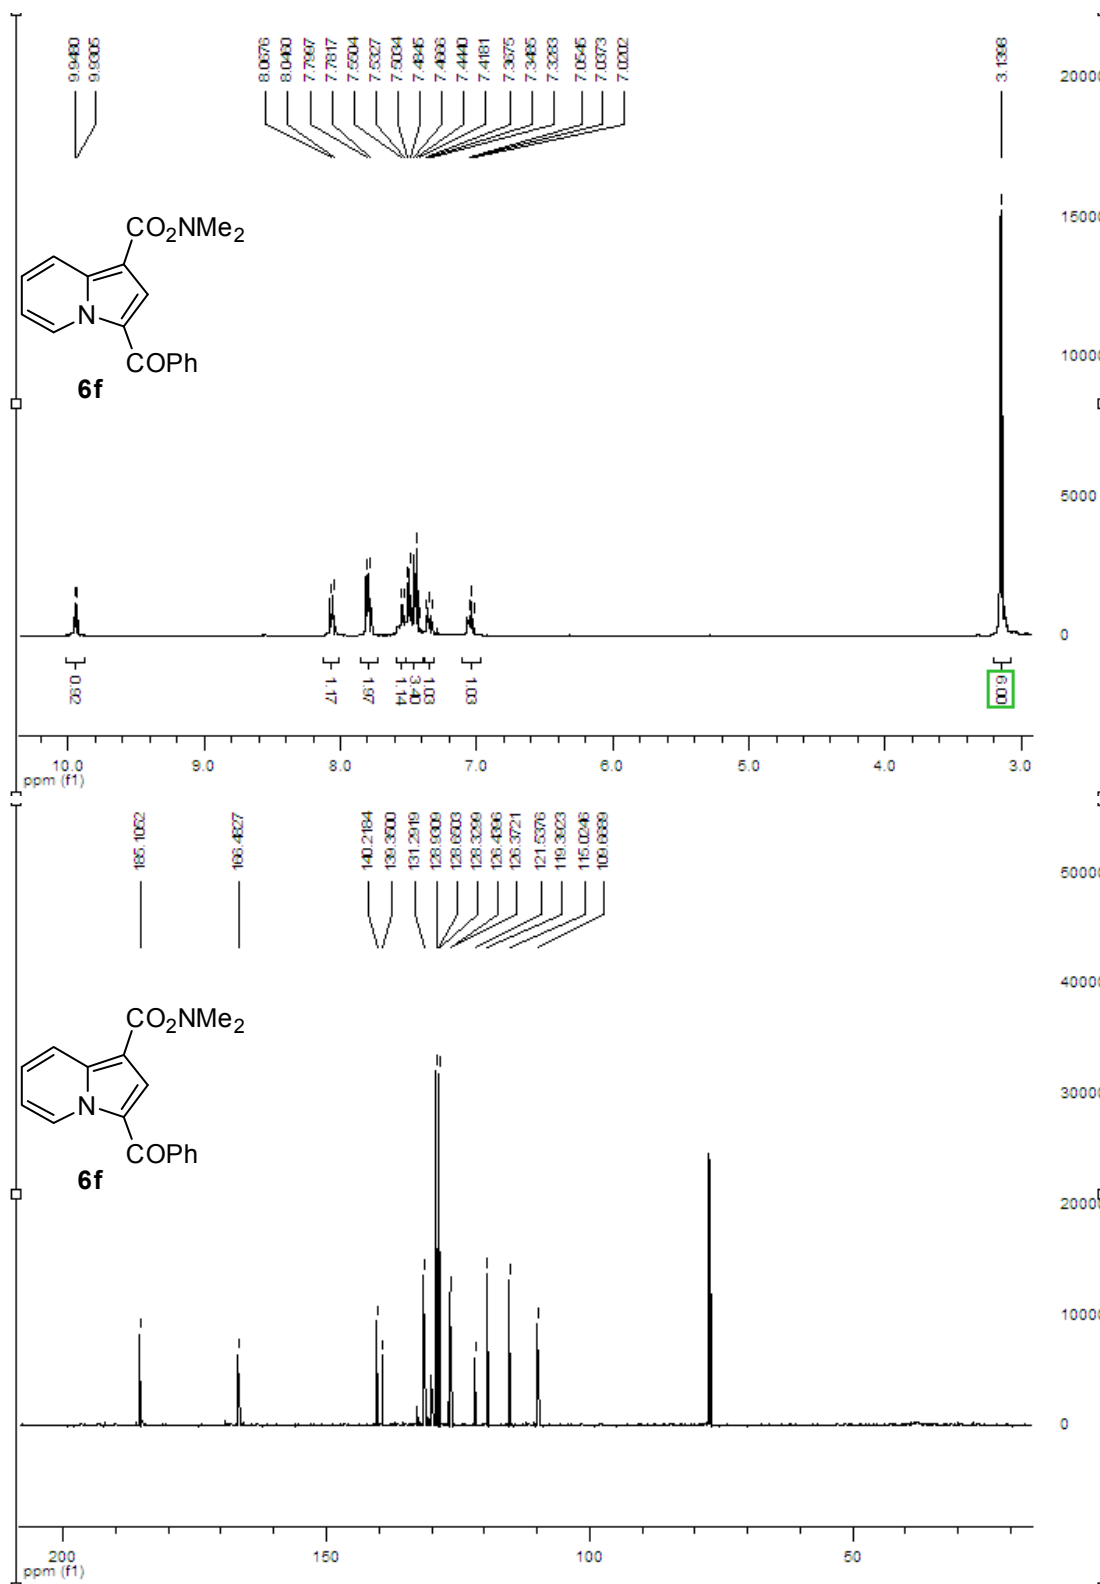

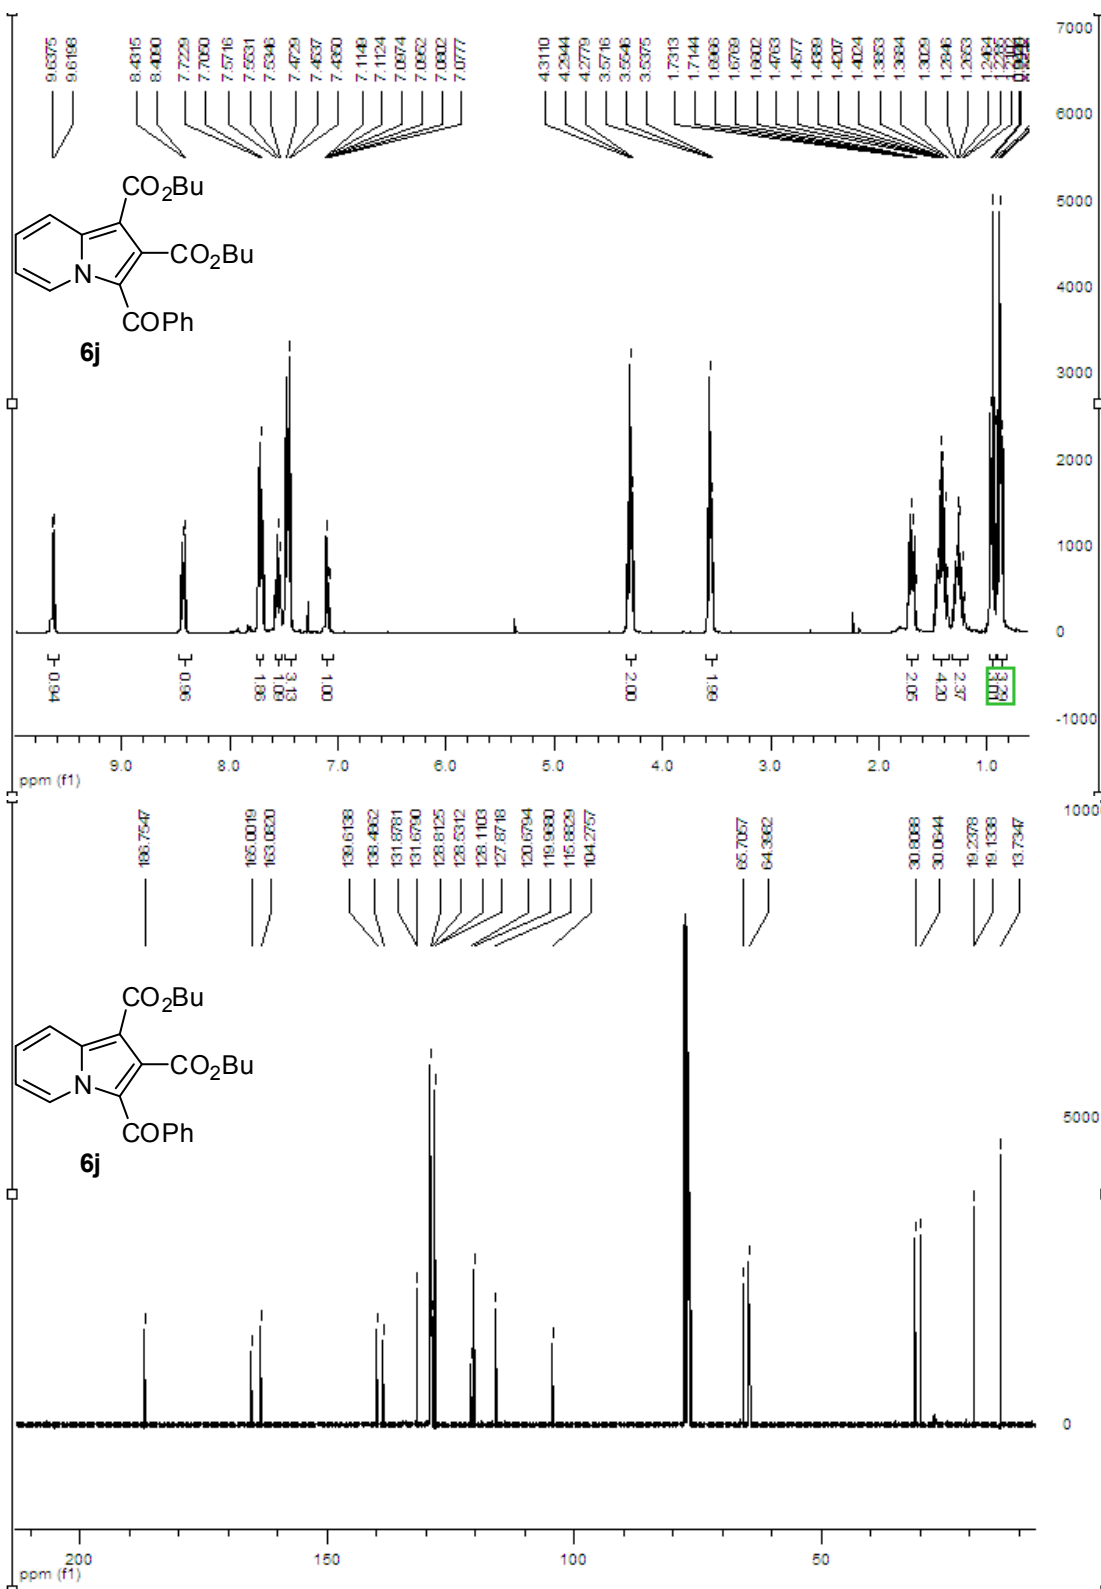

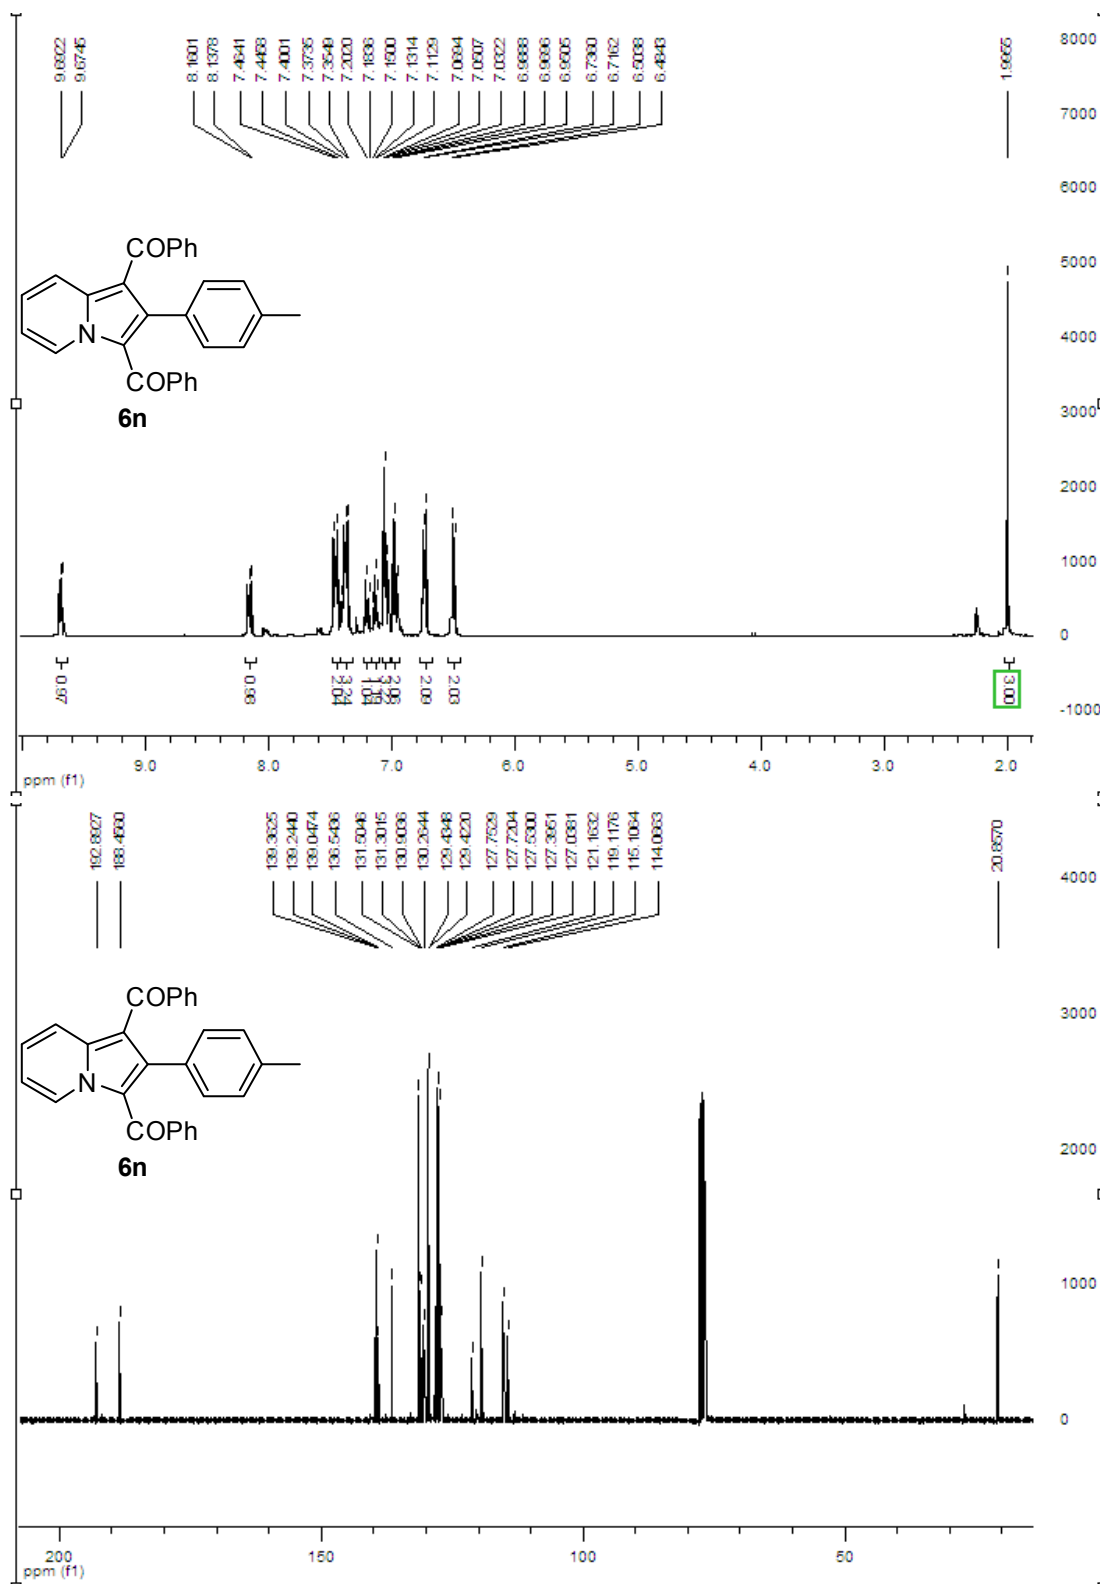

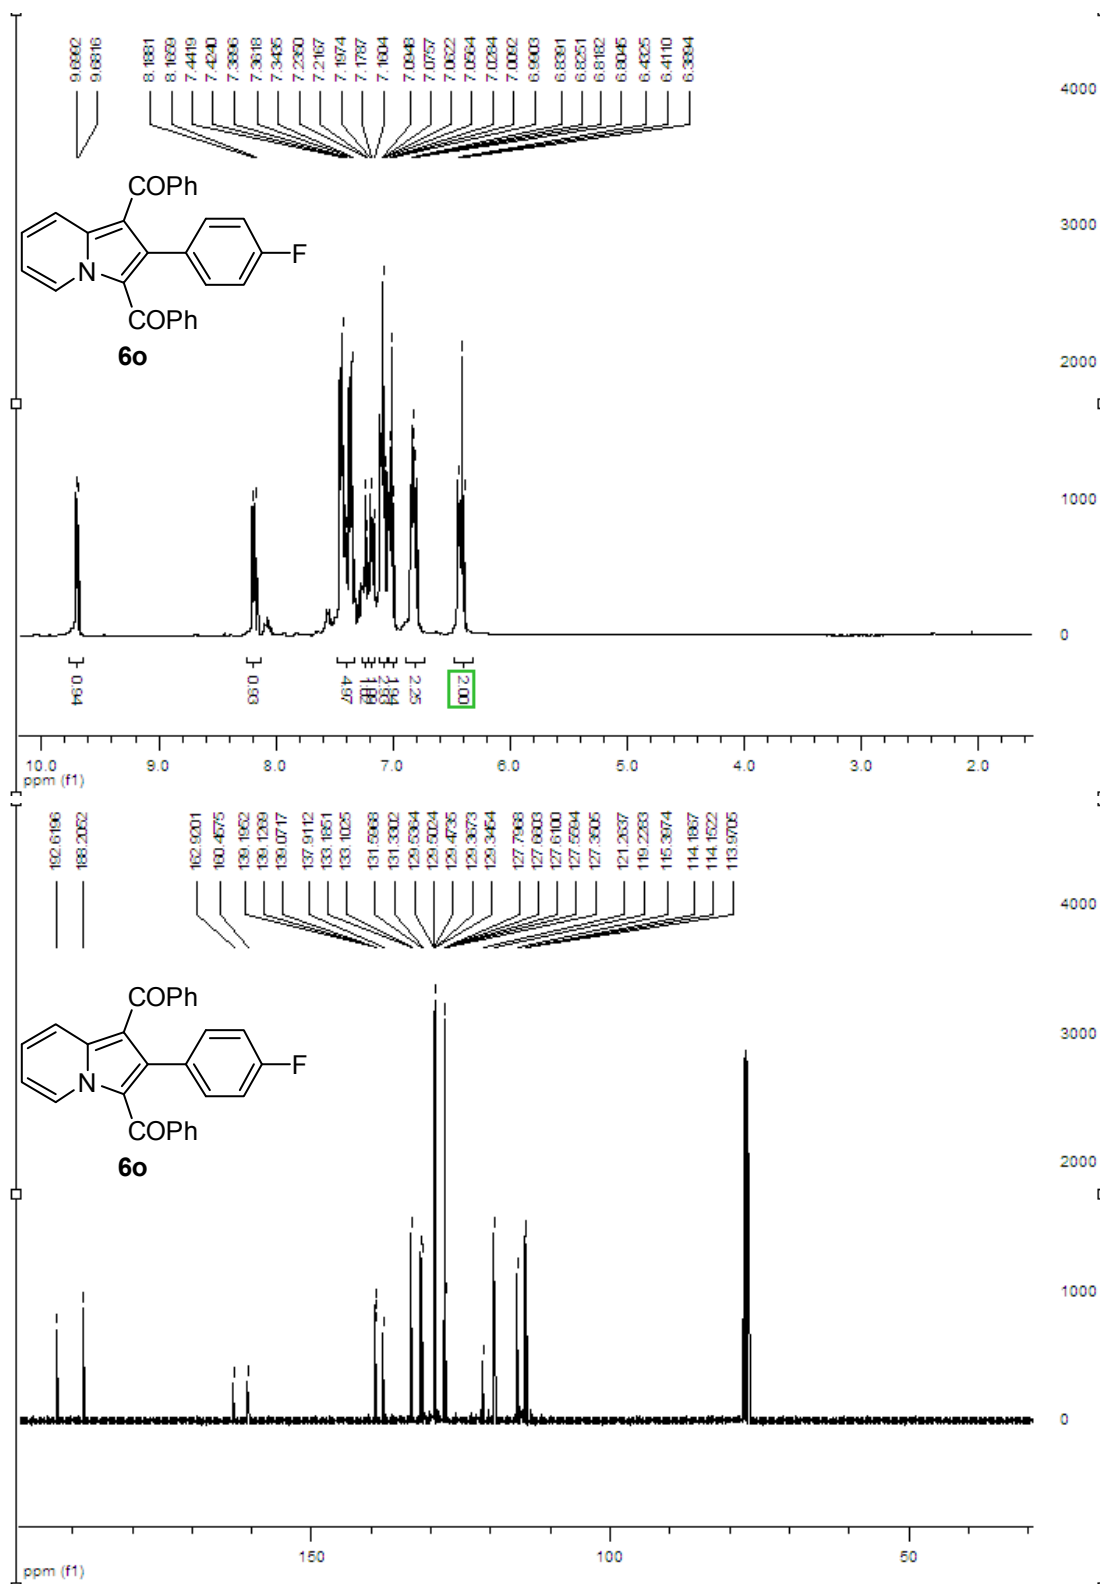

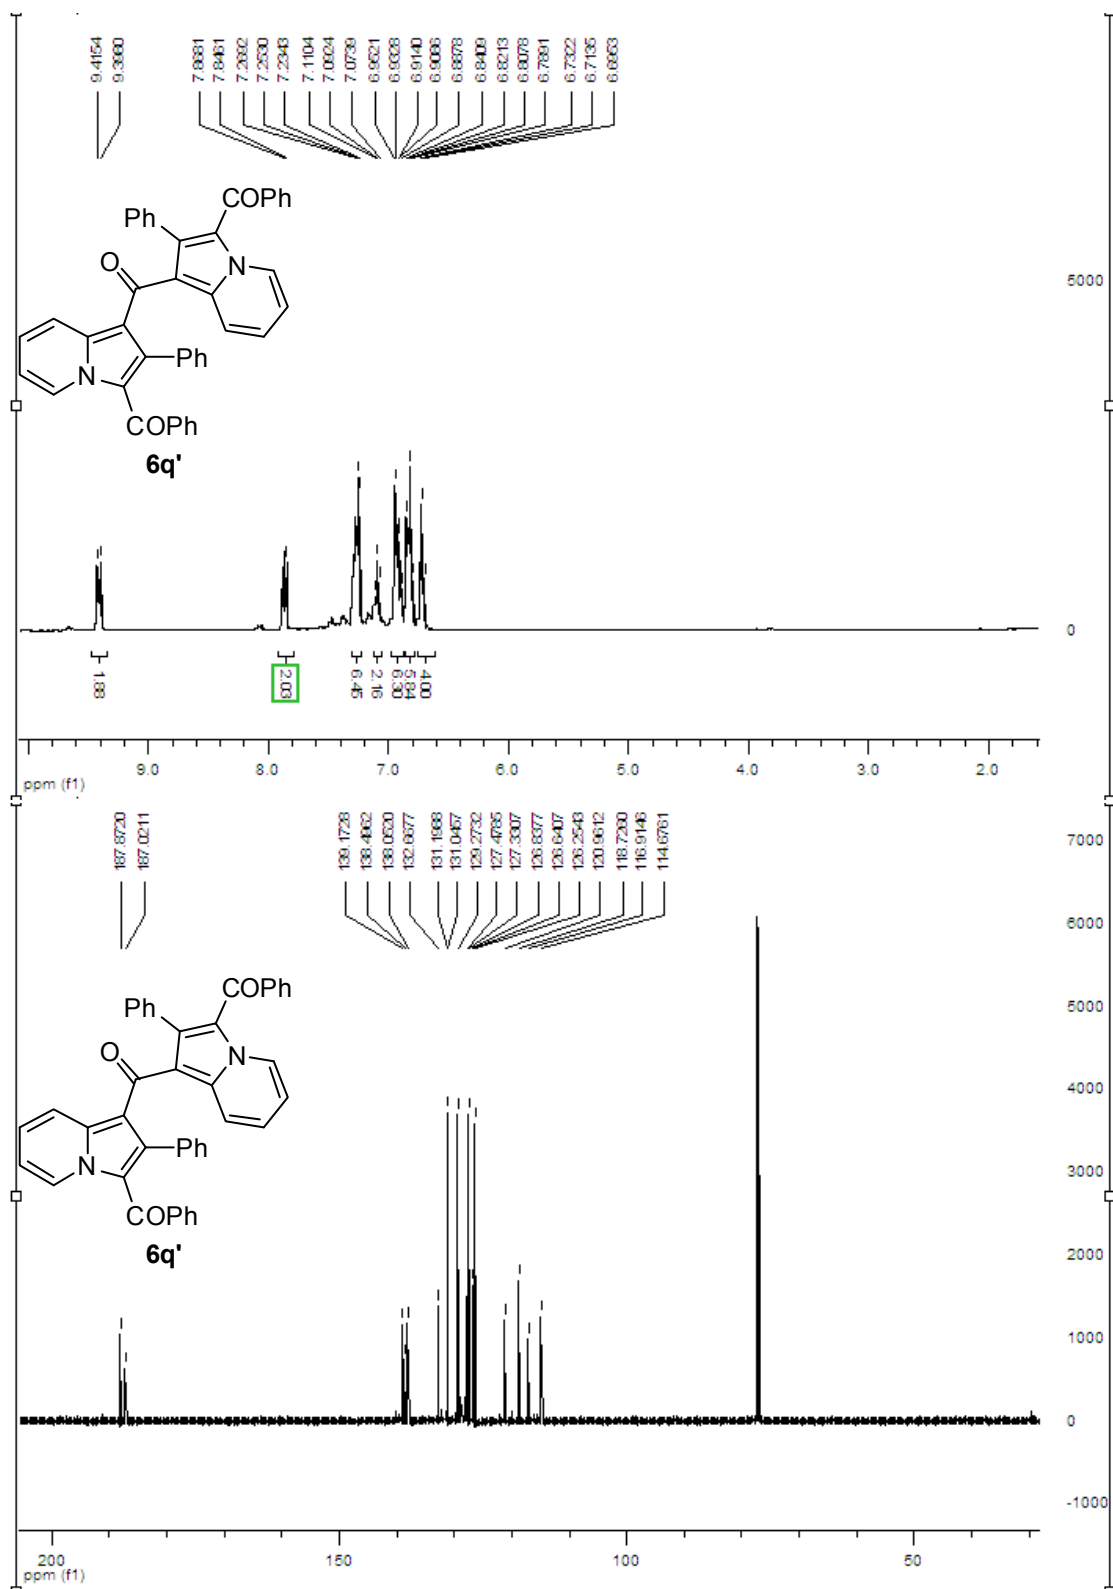

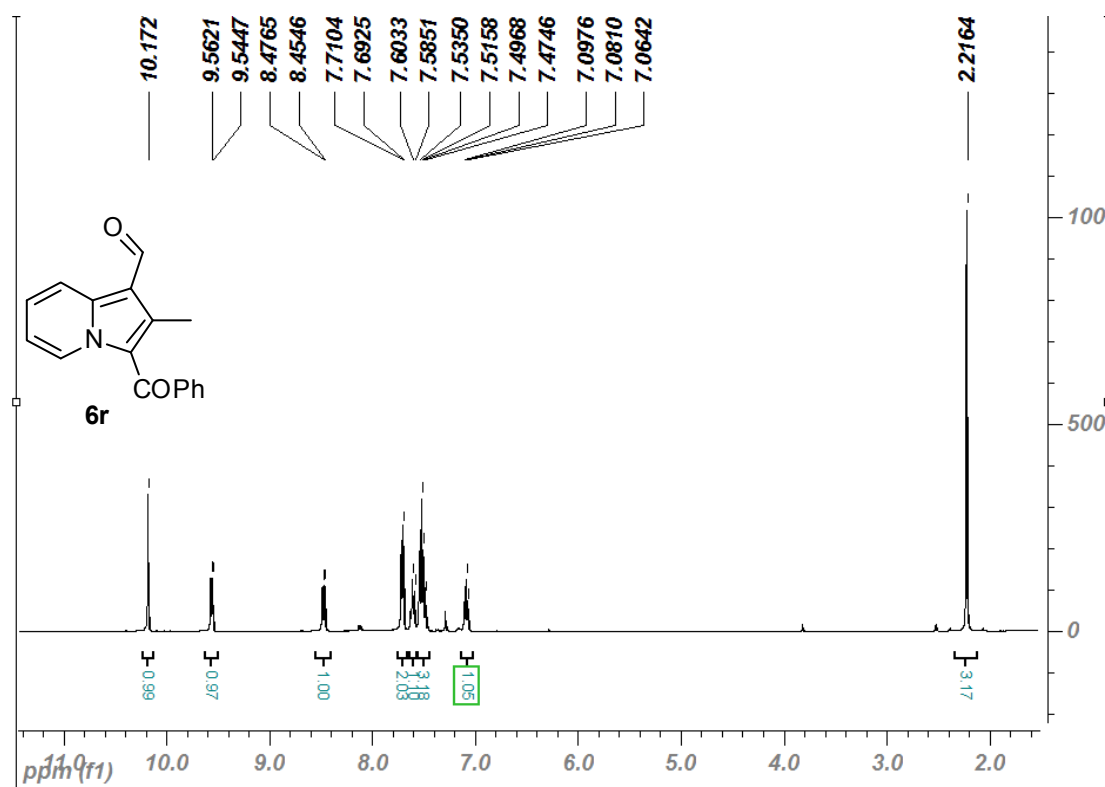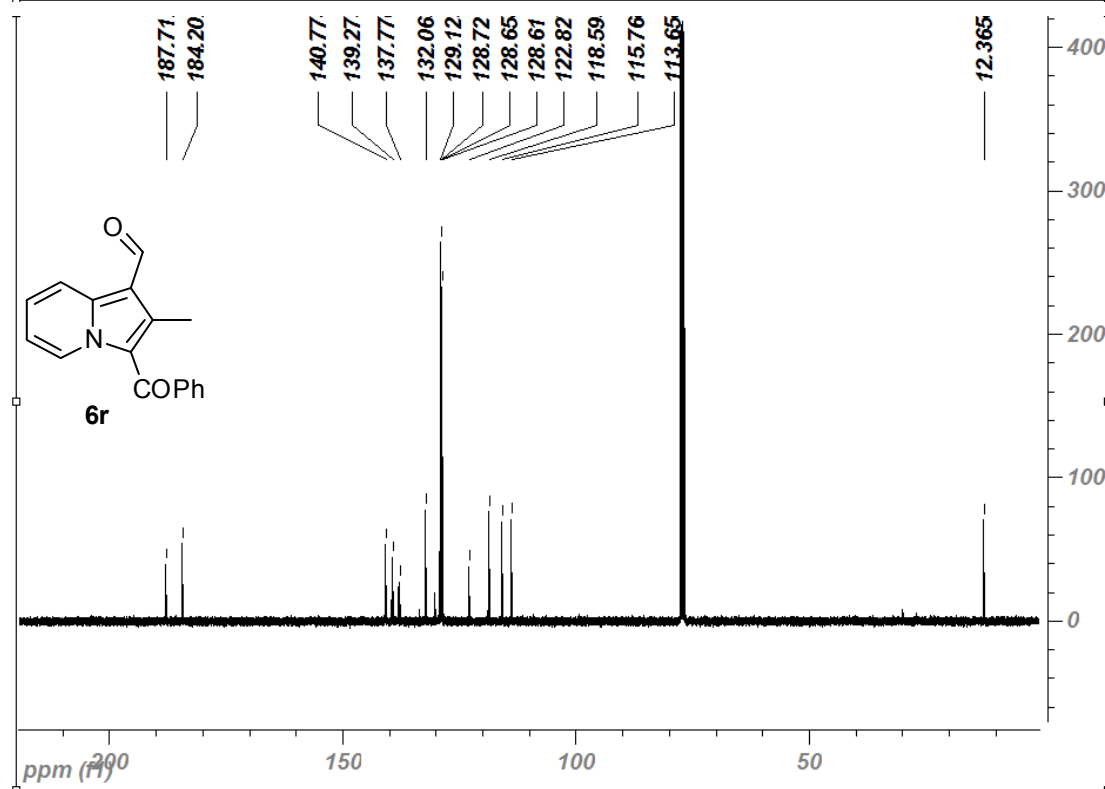



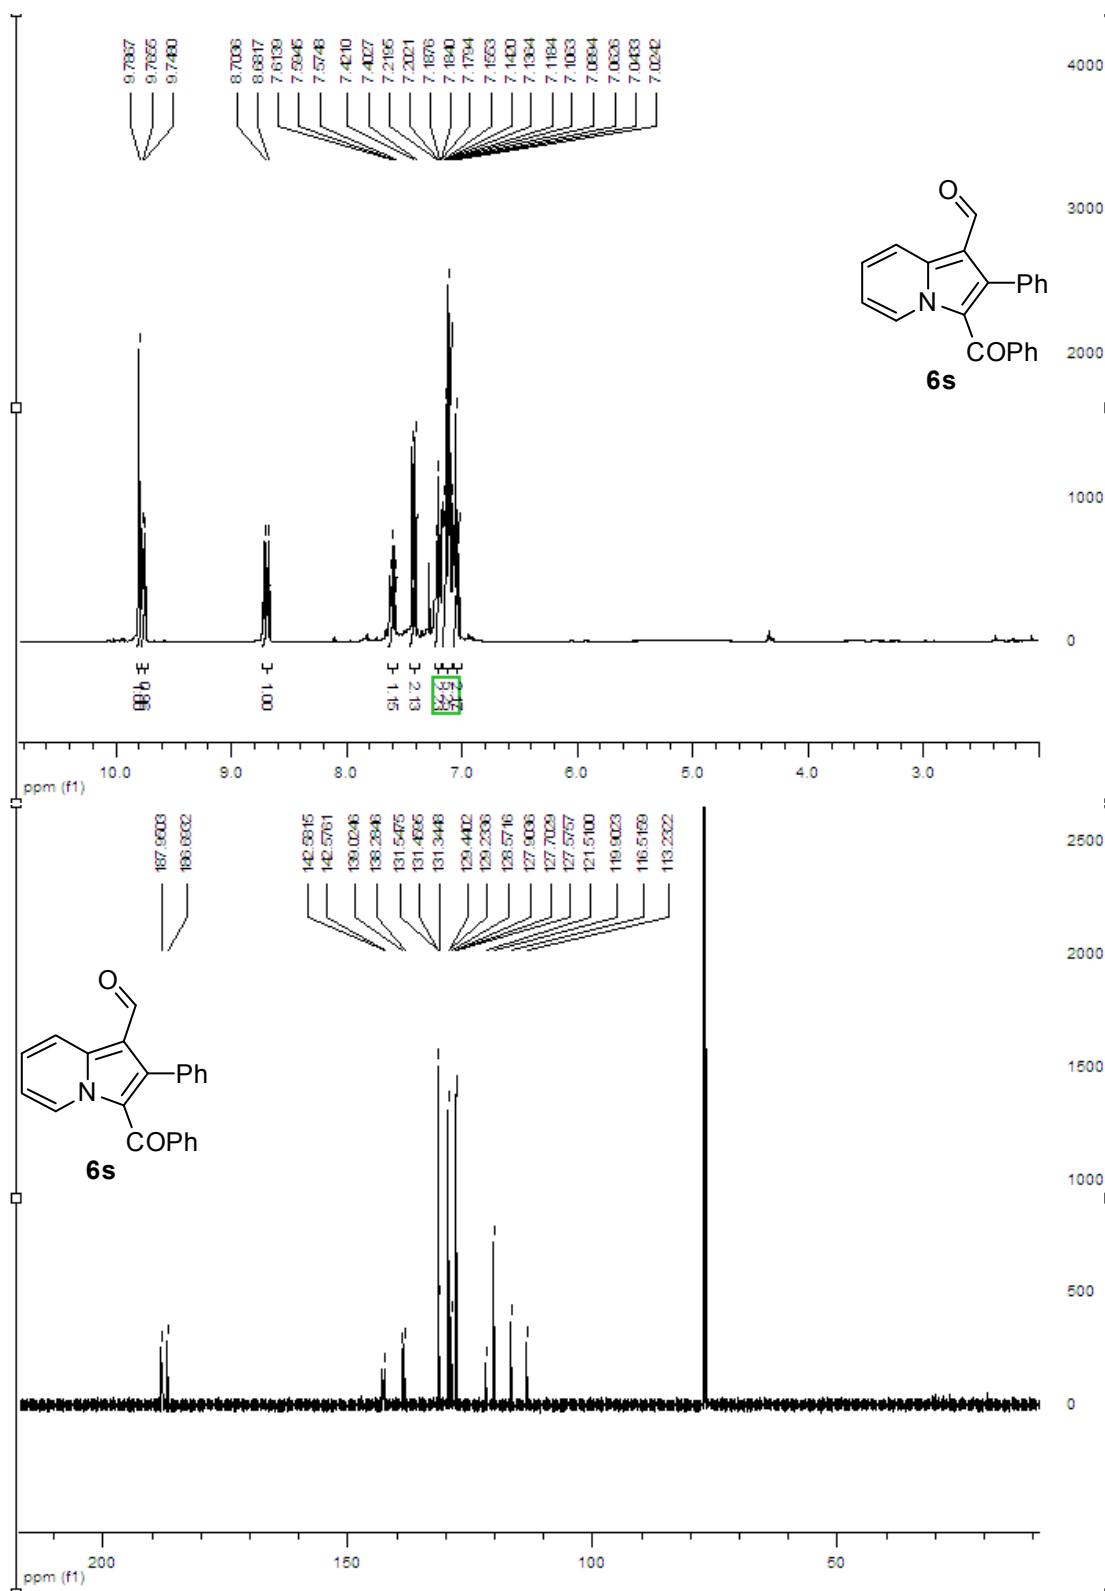

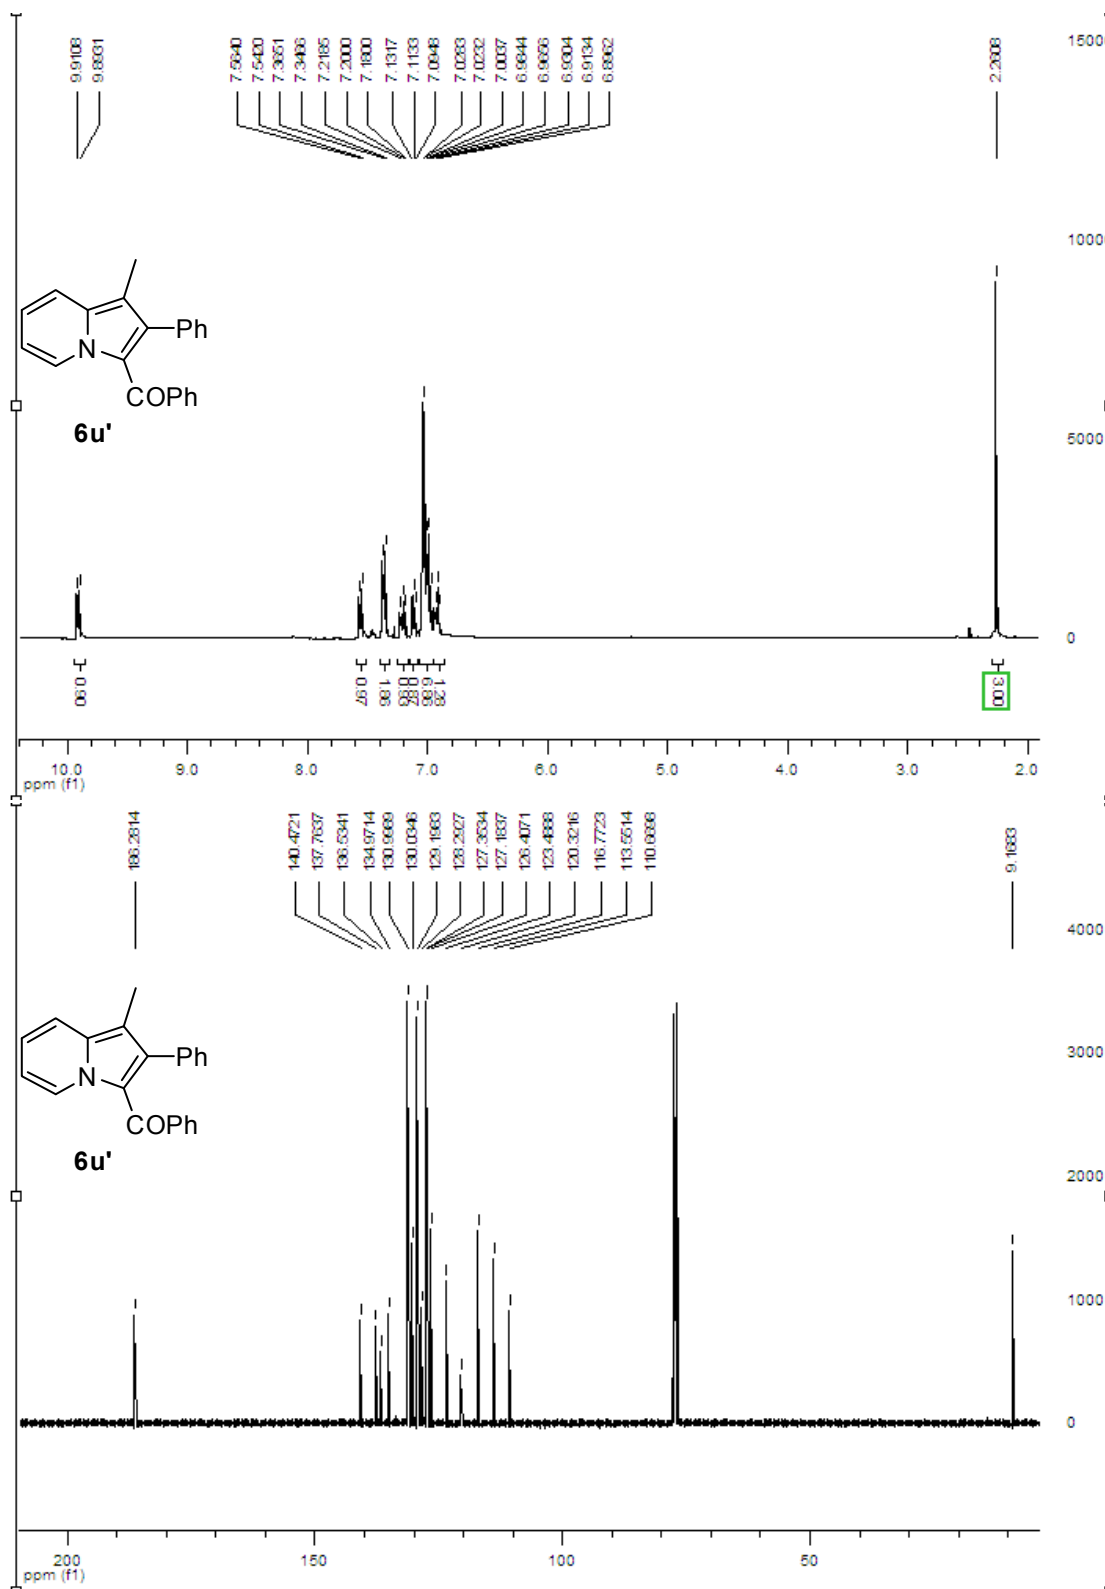

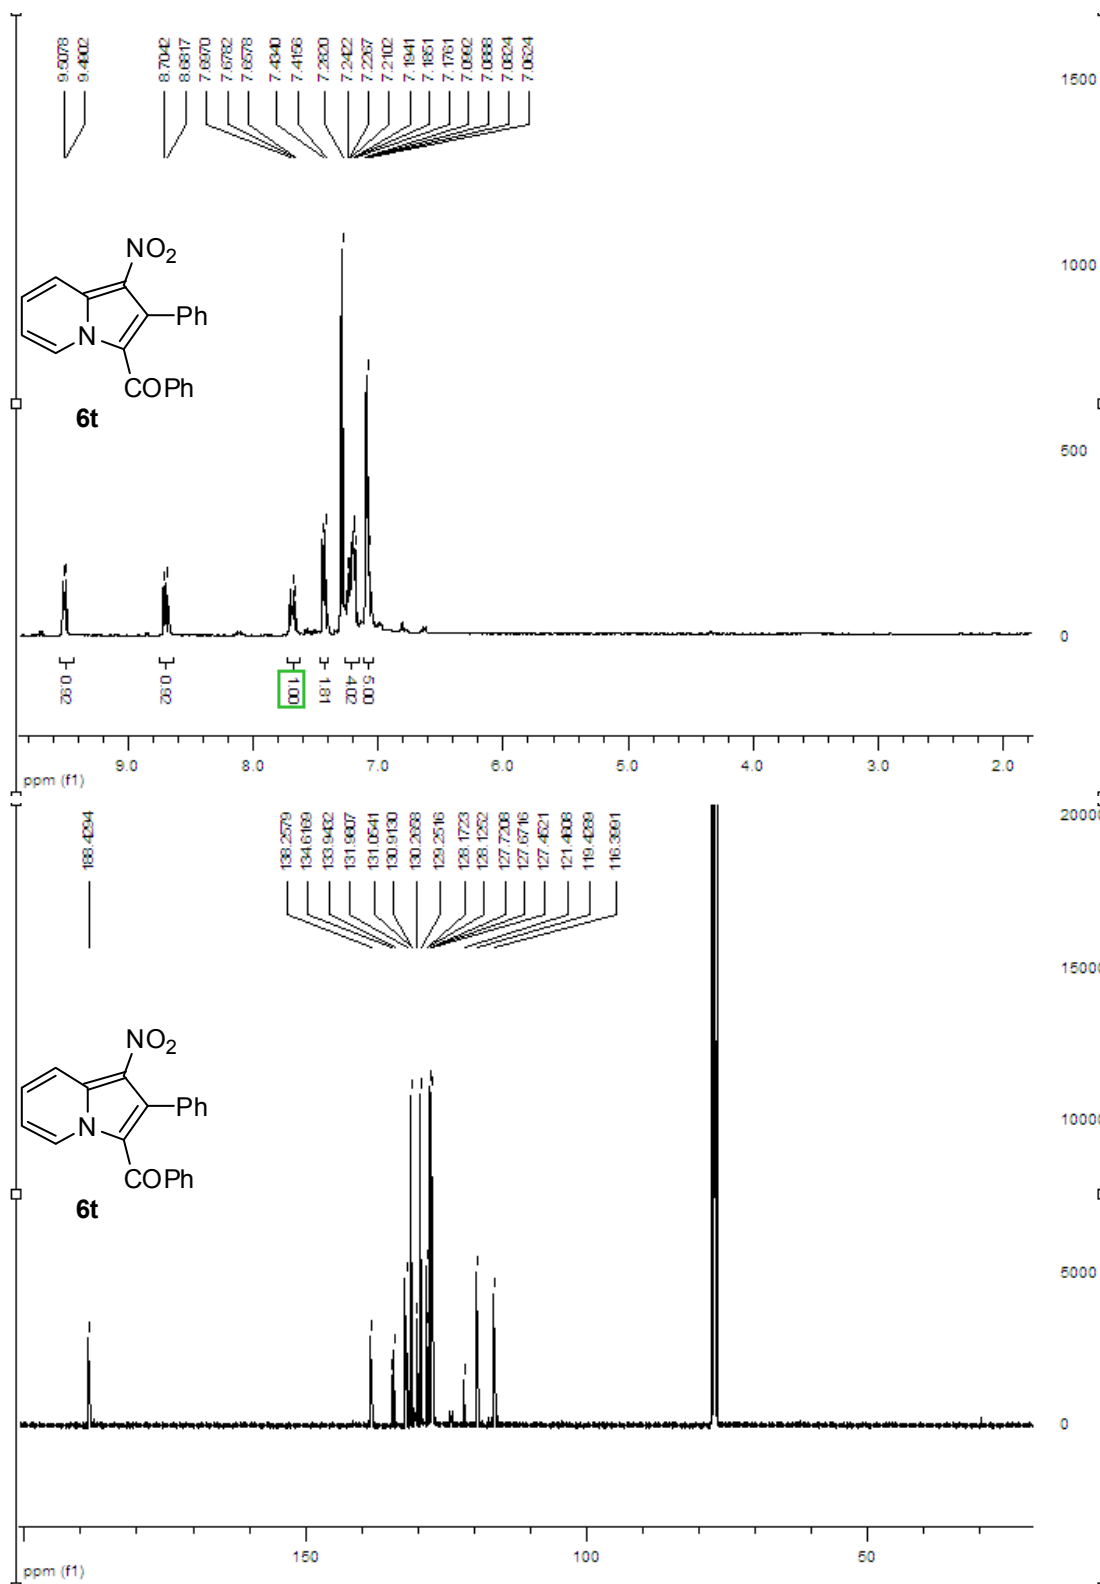

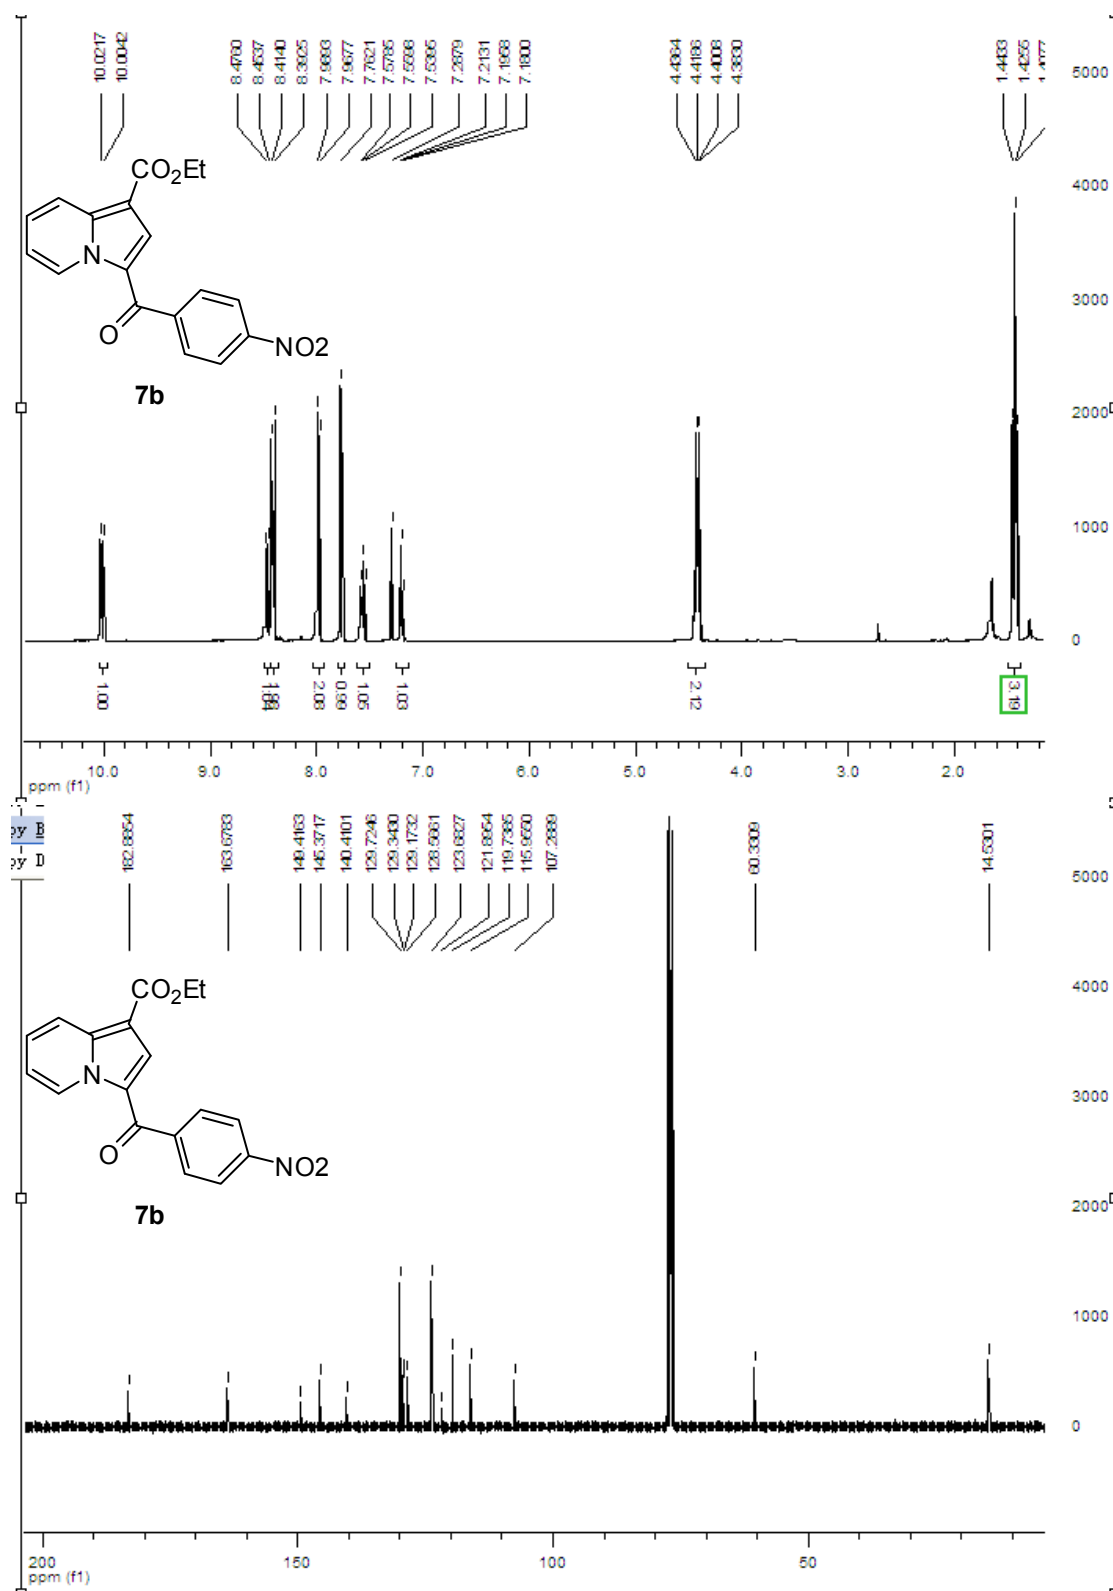

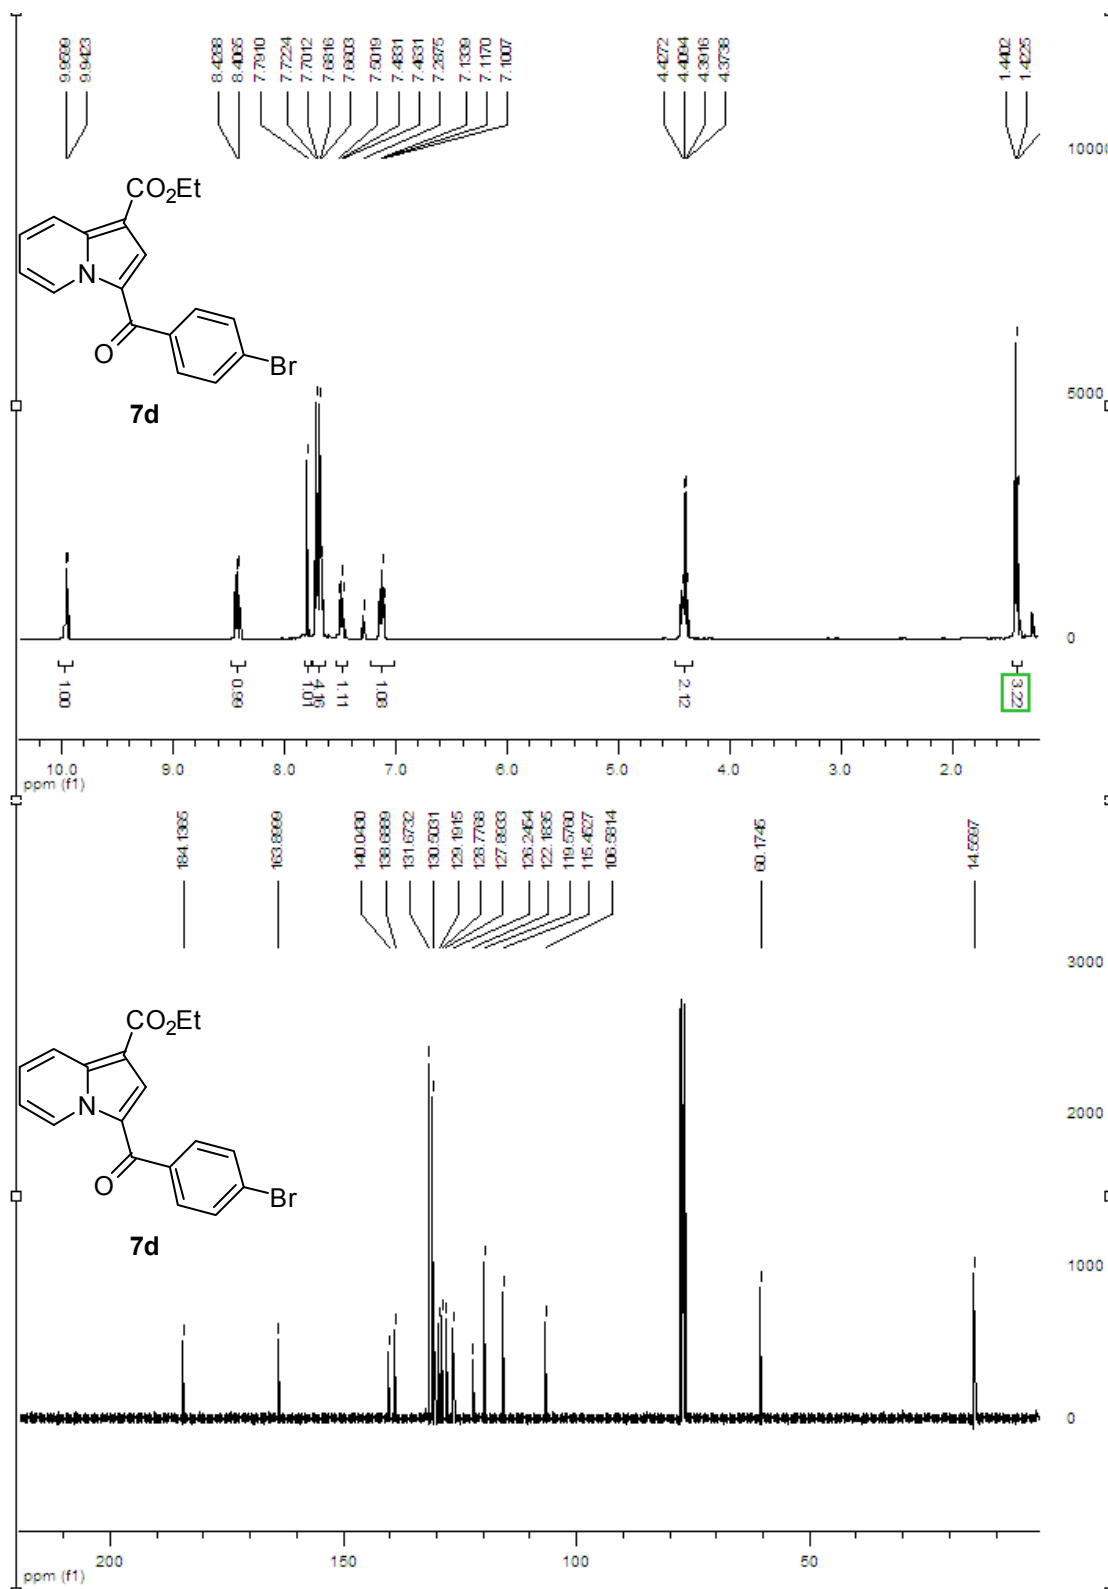

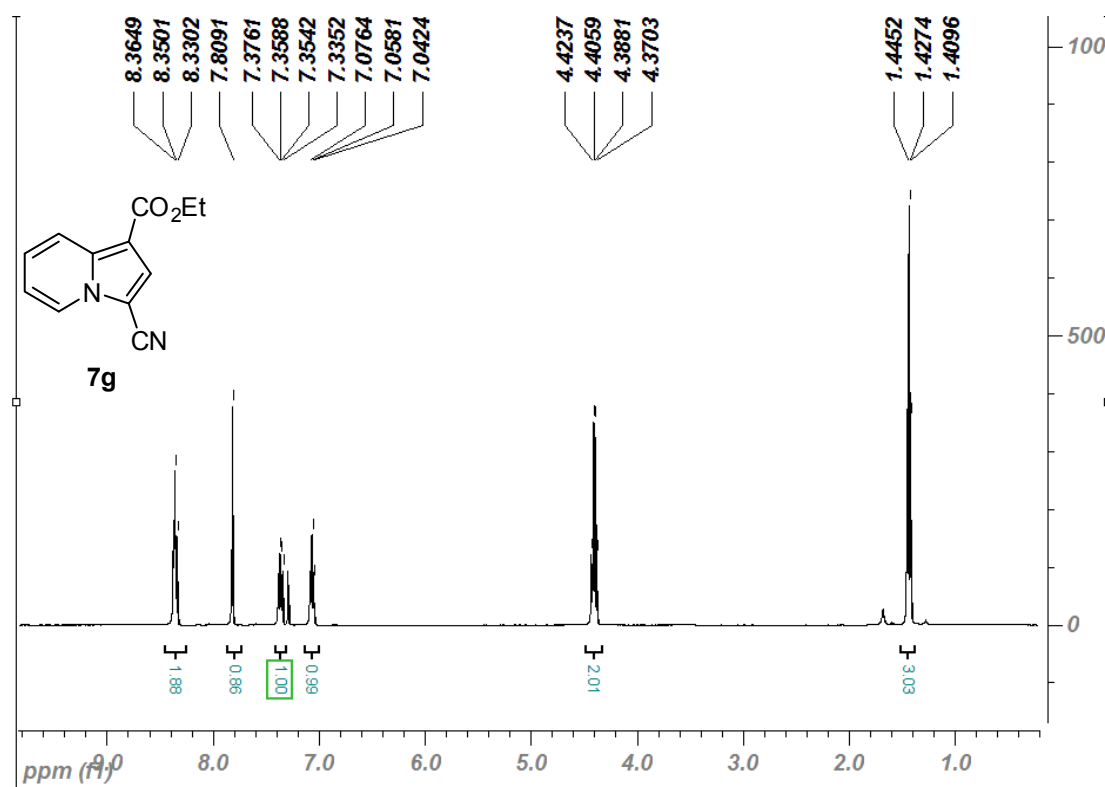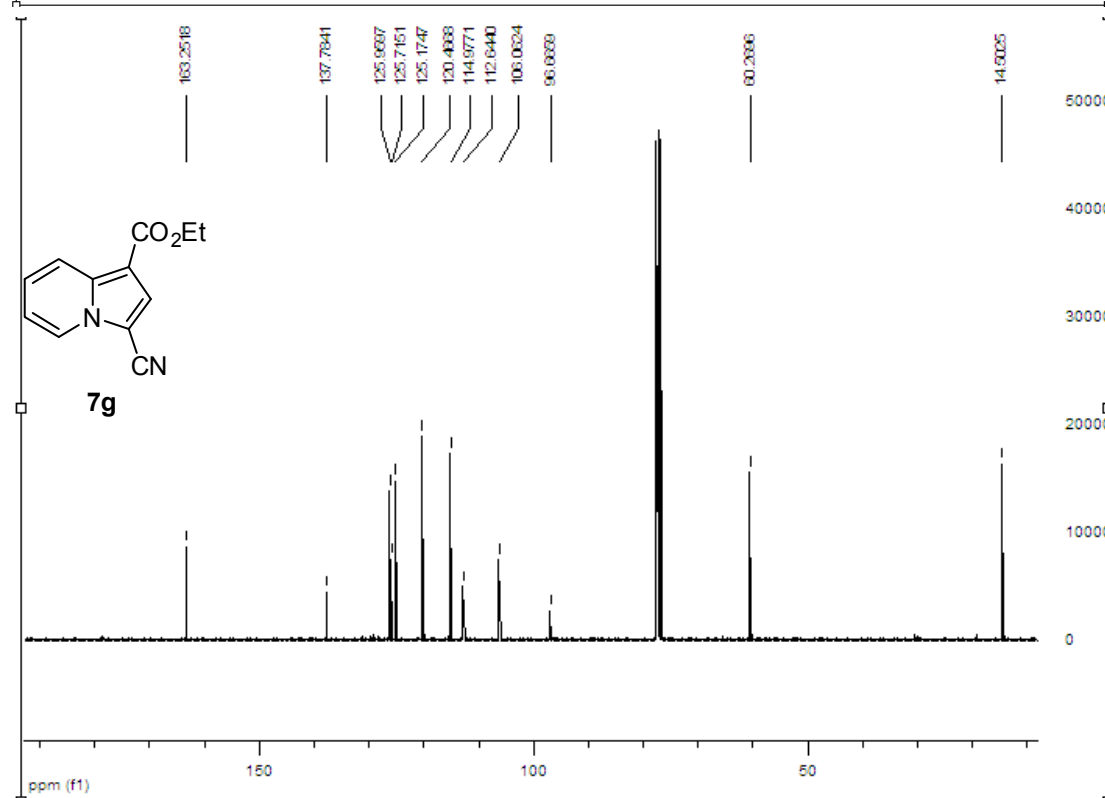

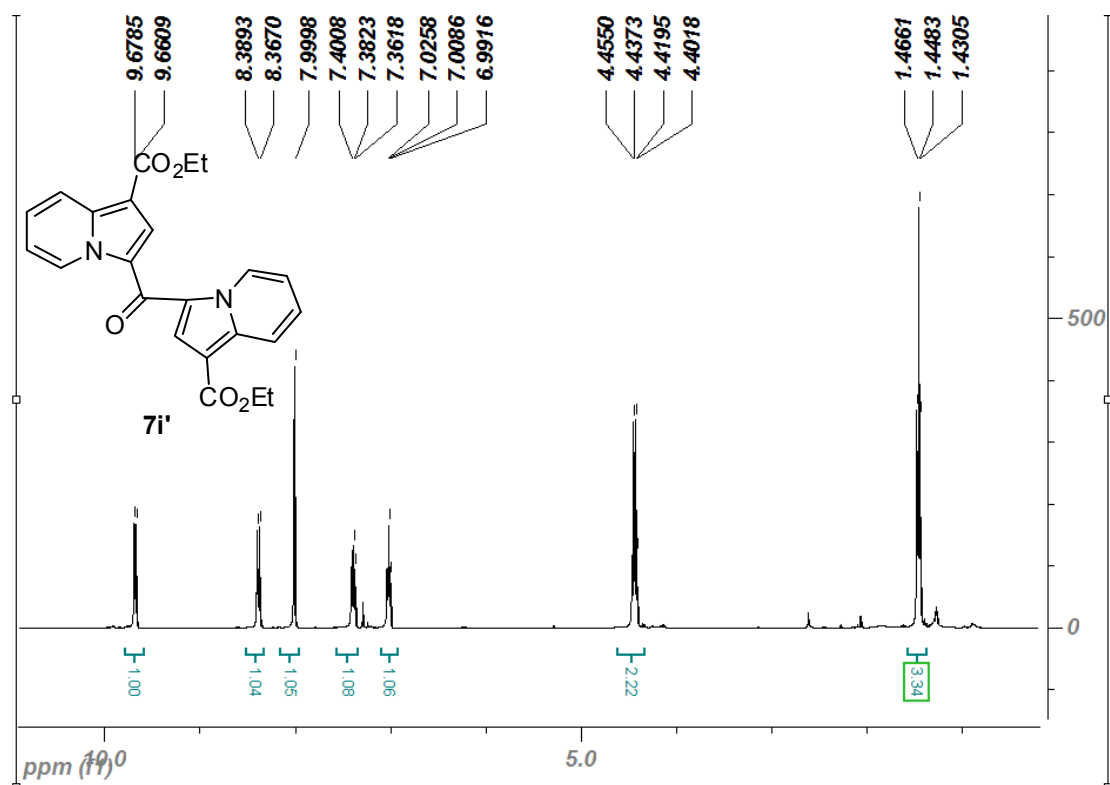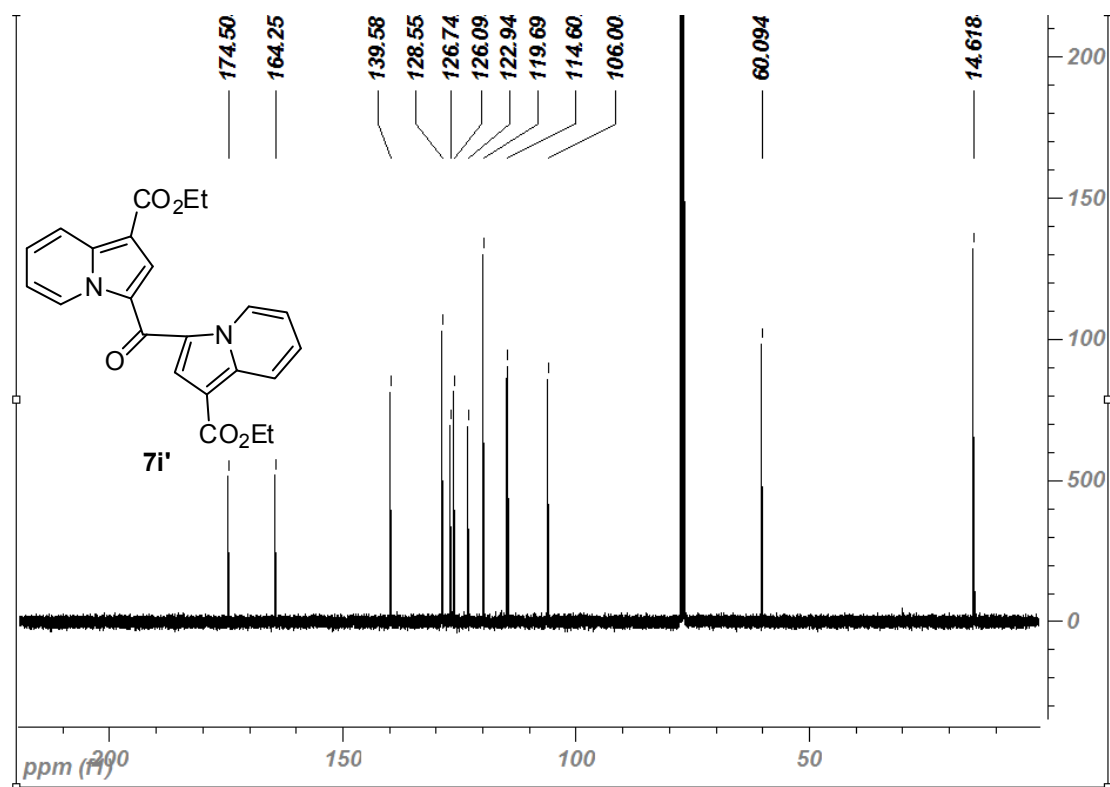

Supplement: c2ra21213g.pdf [file c2ra21213g.pdf]
